# Supplementary material for: Genetic diversity, structure, and effective population size of an endangered, endemic hoary bat, ʻōpeʻapeʻa, across the Hawaiian Islands
Source: PeerJ. 2023 Jan 25;11:e14365. doi: 10.7717/peerj.14365 (PMC9884036; doi:10.7717/peerj.14365)
Supplement: Supplemental Information 14 — Data from 298 individuals at 18 microsatellite loci [file peerj-11-14365-s014.xlsx]

## Sheet: Hawaiian hoary bat microsatelli
USGS Genetic ID	Population	LcM	LcO	LcP	LcU	LbG	19LAS9263AG	20LAS9284AG	21LAS9367AC	5LAS6266AG	6LAS7831AC	9LAS9555AG	10LAS9618AC	11LAS4206AC	12LAS8830AC	13LAS8843AC	14LAS9141AC	15LAS9290AC	16LAS9524AC
M23	Maui	229235	202202	248248	266270	220220	301301	0	218228	0	426426	0	164168	273273	251267	153159	312312	0	0
M24	Maui	229229	202202	248256	266270	218220	301301	433433	232232	0	426426	0	164170	273273	269271	159159	310310	366380	0
M22	Maui	229229	202202	248248	266266	218220	301301	429433	222232	322330	426426	0	164168	275283	251263	159159	310312	378386	0
M25	Maui	223233	202204	248256	266274	218220	301301	433433	228228	318330	426428	0	164170	273273	269271	153163	312312	380384	401411
K2_FJB24	Kauai	219259	202202	248248	262266	218222	301301	433433	230236	330332	426426	457487	164172	273273	267269	163163	316316	378382	413417
K1_FJB09	Kauai	257271	202202	248248	266270	218220	301301	433433	232232	330334	426426	457473	164172	273273	251269	159163	310312	382386	413417
H109_FJB08	Hawaii	253267	202202	248256	258278	218220	301301	429433	232234	320322	426426	467481	164168	273275	267271	159163	312316	380380	405409
H1409	Hawaii	257257	202202	248248	262270	216228	301301	429433	218232	320322	428428	473473	164164	273273	251269	159163	316316	378384	401403
M2_FJB18	Maui	257257	202202	248248	270274	222226	301301	433433	218222	308330	426426	475489	172178	273273	271271	159159	310312	384386	421425
M1_FJB19	Maui	239251	202202	248248	270270	222222	301301	433433	218232	308322	426428	475487	164178	273283	267271	159163	312312	384386	411411
H1509	Hawaii	225257	202202	248248	262274	218232	301301	433433	230232	318322	426428	479483	164164	273275	267269	159159	314314	374390	401409
H3	Hawaii	225225	202202	248248	266270	222222				320330	426428	475481	156164	273275	265267	159159	310314	382384	405413
H710_FJB25	Hawaii	223257	202202	248248	262274	220234	301301	433433	218230	318330	426426	473477	164172	273275	269269	153163	316316	380384	399415
H2210_FJB29	Hawaii	199225	202202	248248	266270	220226	301301	433433	222228	318320	426430	473483	164164	273273	251267	153153	308316	378380	401407
M3_FJB23	Maui	257257	202202	248248	266274	220222	301301	433433	222228	308316	426430	465465	164168	273273	251265	153159	310312	380384	421421
M5_FJB28	Maui	259259	202202	248248	258270	220234	301301	429429	218228	322324	426430	465489	164168	273273	269271	163163	312312	378384	411421
M4_FJB27	Maui	233259	202202	248248	270270	222236	301301	433433	224224	318330	426426	475475	156170	273273	251251	159163	312312	384384	409413
H1610	Hawaii	257257	202202	248256	258274	218220	301301	429433	234234	318320	424426	449473	164168	273283	269271	153159	312312	380380	405413
M7_FJB31	Maui	223259	202202	248256	266270	220222	301301	433433	232232	330334	428428	473475	164170	273273	263267	159319	316160	378386	409413
H1710	Hawaii	227257	202202	248248	258258	220220	301301	433433	218232	320330	426426	473473	164172	273273	267267	153159	312316	378380	401421
H1810	Hawaii	257257	202202	248248	270274	220220	301301	433433	232234	318326	426428	473477	164164	273273	251271	159163	312314	384384	421425
H1910	Hawaii	257257	202202	248248	270270	218220	301301	433433	218232	318322	426426	465483	164164	273273	267271	159163	316316	380382	401421
H2010	Hawaii	223233	202202	248248	266266	218220	301301	433433	228232	316318	426426	481485	172172	273273	271271	153153	308314	380388	409409
H210	Hawaii	257257	202204	248248	270270	0	301301	433433	232236	320322	426428	473483	164164	273273	269271	159159	314318	384386	407413
H2110	Hawaii	199225	202202	248248	266270	218224	301301	433433	232234	320322	426426	471479	164164	273275	271271	153159	314316	380384	405409
H2211	Hawaii	225239	202202	248248	262270	232232	301301	433433	228232	318320	426426	449469	164168	273273	269271	159163	312314	378380	407409
H2212	Hawaii	223257	202202	248256	270274	218220	301301	433433	230234	318322	430430	477481	164168	273275	269271	159159	310316	388390	421421
H2213	Hawaii	257257	202204	248248	274274	218222	301301	433433	228234	320324	426428	481485	164170	273275	269271	153163	314318	380380	409411
H2214	Hawaii	215223	202202	248248	266278	218224	301301	433433	232234	314314	426428	0	164164	271273	265267	163163	310310	380386	405409
H2215	Hawaii	227253	202208	248248	258270	218220	301301	429429	218224	318324	426426	469483	164164	273273	267271	153159	312312	380384	409413
H2216	Hawaii	257257	202208	248248	262266	220220	301301	433433	228234	320330	426426	473473	164172	273275	269271	159163	314316	384386	399405
H2217	Hawaii	233257	202208	248248	258266	218224	301301	433433	218232	320326	426428	449475	164172	273273	269271	153159	312314	382386	405409
H2218	Hawaii	221257	202202	248248	262266	220222	301301	429429	222234	318330	426426	475481	164164	273275	251271	159159	314316	380390	397399
H2219	Hawaii	219257	204204	248248	258262	218228	301301	433433	218234	326330	426426	479483	164164	273273	267269	153153	314316	382388	405427
H2220	Hawaii	257257	202202	248248	258262	218220	301301	433433	224232	318324	424424	455469	164168	273273	249265	159159	312314	378390	399399
H2221	Hawaii	249257	202202	248248	270270	218224	301301	433433	222228	318320	426428	473509	164164	273283	267271	159163	306314	356386	409413
H2222	Hawaii	223247	202202	248248	270274	218220	301301	433433	232232	318322	426426	477483	164164	273275	271275	159163	314314	380384	409409
H2223	Hawaii	257257	202204	248248	262270	218232	301301	433433	228230	318320	426430	455479	164172	273285	271271	159163	314316	380388	419421
H2224	Hawaii	199223	202202	248248	262274	218218	301301	433433	224230	324326	428428	475481	170172	273273	251265	159163	308314	380380	421421
H2225	Hawaii	257257	202202	248248	266274	218220	0	0	0	320322	426426	473477	168172	273273	271271	159159	312314	378384	409411
H6_FJB30	Hawaii	257257	202202	248248	258266	220222	301301	433433	232236	320326	426428	473485	172172	273273	265271	159159	310314	384384	409421
H610	Hawaii	257257	202204	248248	270274	218218	0	0	0	0	0	0	0	273273	267271	153163	314314	384384	401411
H7	Hawaii	257257	202202	248248	270274	222226	301301	429433	218228	318322	424426	449455	164164	273273	251271	159159	316316	380380	401409
H8_FJB40	Hawaii	199223	202202	248248	258262	220222	301301	433433	218230	320320	426428	475481	164172	273275	267271	159163	312314	380384	399405
H911	Hawaii	227257	202202	248248	270270	222228	301301	433433	228232	320322	426428	473479	164168	273273	265269	159159	316316	356378	409415
H1011	Hawaii	257257	202202	248248	258270	222228	301301	433433	218222	320322	424430	467475	156164	273273	269271	163163	312312	378386	399405
H111	Hawaii	233257	202202	248248	258270	220220	301301	433433	228228	320330	426426	469477	164172	273273	267271	159159	312314	378378	409413
O1_FJB33	Oahu	219219	202202	248248	270270	226230	301301	433433	228232	318322	426426	457471	172182	273273	271271	163163	312314	378384	421421
O2_FJB34	Oahu	219219	202202	248248	262270	220224	301301	433433	228232	318322	426426	457471	172182	273273	271271	163163	312314	378384	421421
M8_FJB60	Maui	281281	202206	248248	270270	222222	301301	433433	234234	334334	426426	471483	164170	273273	263271	159159	312312	384384	389401
M10_FJB62	Maui	229257	202202	248256	270270	220224	301301	433433	224232	318322	426428	483489	170172	273283	267271	159159	316316	384386	411421
M9_FJB61	Maui	223229	202202	248256	270270	220220	301301	433433	232234	308308	426428	457465	168172	273273	251267	159159	310310	386386	411427
H211	Hawaii	257257	202202	248248	262266	220222	301301	433433	226234	320322	426426	449485	156164	273275	265275	159159	308314	380382	405409
H2226	Hawaii	257257	202202	248248	266266	220232	301301	433433	222232	322330	426426	477477	164164	273273	271271	153159	312316	382386	421421
H311	Hawaii	221253	202208	248248	270270	220228	301303	433461	226230	318318	426428	463483	164168	273273	271271	153159	312314	380382	409419
H511	Hawaii	257257	202202	248248	270278	218228	301301	433433	218234	316318	426426	467473	168170	273273	269271	153159	308312	376386	403407
H611	Hawaii	257257	202202	248248	270274	220224	301301	433433	218218	320322	426430	469477	164164	275283	271273	159159	308314	386390	405411
H711	Hawaii	257257	202202	248248	266266	226228	301301	433433	226232	320320	428428	451477	164178	273273	271273	153163	312314	380386	407409
H9_FJB32	Hawaii	219257	202202	248248	258262	220222	301301	433433	230232	318320	426428	449477	164164	273273	267271	159159	310314	384384	405411
H50112	Hawaii	247257	202202	248248	270270	220220	301301	433433	228230	318320	426426	455475	170172	273273	251267	153159	312316	382384	413419
H50113	Hawaii	219257	202204	248248	266270	218220	301301	433433	228228	0	426426	471481	168178	273275	251273	159163	314316	380380	399401
H10	Hawaii	257257	202202	248248	266270	222222	301301	433433	228234	318322	426426	465481	164164	273273	251271	159163	312314	380388	407407
O3_FJB63	Oahu	215219	202202	248248	270270	218224	301301	433433	228232	322332	426426	457471	172182	273273	251271	163163	312314	380384	409417
O4_FJB64	Oahu	219257	202202	248256	266274	224224	301301	433433	232232	316318	426428	487487	164172	273273	271271	159163	310312	380386	417421
O5	Oahu	219219	202202	248248	270274	222226	301301	433433	228230	316318	426426	457487	164172	273273	267271	163163	312314	378378	421421
M11	Maui	229259	202202	248248	266270	220222	301301	433433	222234	308322	426426	481487	164176	273283	267267	153163	310310	380384	411417
M12	Maui	223259	202202	248256	270270	222222	301301	433433	218232	322330	426428	473477	172172	273273	251271	153163	312316	384386	409413
H12	Hawaii	217257	202202	248248	266270	220220	301301	433433	222232	318318	426426	461483	164164	273273	265271	159159	312314	382382	409415
H15	Hawaii	257257	202202	248248	262266	220230	301301	433433	218222	320322	426428	475479	164172	273273	267269	163163	312314	376384	405419
M13	Maui	229259	200202	248256	270274	222222	301301	433433	228228	326330	426428	457489	164172	273283	271271	153159	310312	366380	401411
M14	Maui	257257	202202	248248	266270	220222	301301	433433	228232	322328	426426	473473	164172	273283	251267	159163	310310	378382	405411
M15	Maui	209223	202202	248256	266270	218220	301301	433433	228228	318322	428428	455497	198200	273273	267271	159159	310312	380386	409413
M16	Maui	239259	202202	248248	270274	222222	301301	433433	228232	328334	426426	465483	164170	273273	251251	159159	310316	366366	401413
M17	Maui	223259	202202	248256	266270	218220	301301	429433	218218	322322	426426	483483	164170	275283	251267	153153	312312	378386	413413
M18	Maui	231257	202202	248248	270270	218220	301301	433433	222236	316324	426426	465487	168172	273273	251267	159159	312316	378384	411411
O10	Oahu	221221	202202	248248	266270	218230	301301	433433	230230	320334	426430	473485	164164	273273	267275	163163	314314	378380	421421
O11	Oahu	219257	202202	248248	274274	222224	301301	433433	230230	318322	426426	457477	164172	273273	271275	159163	312312	378386	417427
O12	Oahu	219259	202202	248248	262274	220222	0	0	0	0	0	0	0	271273	0	153163	312312	0	0
O13	Oahu	219259	202202	0	270270	220230	301301	433433	230230	316316	426428	457487	172172	273273	271275	163163	312314	378378	421421
O14	Oahu	219271	202204	248248	270274	218222	301301	433433	230232	318330	426428	457487	164172	273273	251271	159163	310312	378380	413421
O15	Oahu	219219	202202	248248	270274	220224	301301	433433	230230	322332	426426	457477	168172	273273	251275	163163	312316	378378	421421
O16	Oahu	219259	202202	248256	270270	220220	301301	433433	230230	316316	426428	487487	172172	273273	271271	163163	312312	378378	421421
O17	Oahu	221259	202202	248252	270274	220230	301301	433433	230230	316320	426434	485487	164172	273273	271275	163163	312312	378378	421421
O18	Oahu	219219	202202	248248	266274	220224	301301	433433	230232	318332	426426	457487	164172	273273	251275	163163	314316	378378	421421
O6	Oahu	231257	202202	248256	270274	220226	301301	433433	230236	318330	426428	457473	164172	273273	267271	163163	310312	378378	389421
O7	Oahu	215219	202202	248248	270274	218218	301301	433433	230236	0	426426	0	164172	273273	251271	159165	312316	378378	411421
O8	Oahu	219257	202202	248248	262266	220224	301301	433433	230230	332334	426426	457473	164172	273273	271275	163163	310312	378378	411427
O9	Oahu	219219	202202	248248	266270	224224	301301	433433	228230	318336	426426	457487	164172	273273	271275	159163	312314	378386	417417
M19	Maui	219257	202204	248248	266266	220228	301301	433433	224228	322322	426426	471485	164164	273273	269269	159161	308314	382384	409409
M20	Maui	229229	202202	248248	266278	220220	301301	429433	228232	316322	426426	471487	172182	273273	251251	163163	310312	384386	421421
M21	Maui	229247	202202	248248	266274	222222	301301	433433	228234	318320	426426	451475	164168	273273	265271	159159	312312	384386	401403
M27	Maui	239245	202202	248248	266270	220220	301301	429433	232232	308334	426426	475477	156170	273275	251265	159159	312312	380386	401411
H16	Hawaii	247257	202204	248256	262266	218218	301301	433461	226230	314320	426426	469473	164168	273273	249251	153159	314314	378386	409419
H17	Hawaii	235261	202202	248248	270270	220224	301301	429433	222222	320324	426430	449477	168172	273273	267271	163163	312312	380380	407411
HMU1	Hawaii	257257	202202	248248	258266	218222	301301	429433	228234	314320	426426	455477	164172	273273	251269	159159	312314	380390	405409
H1511	Hawaii	219257	202202	248248	266270	224224	301301	433433	218234	320322	426428	473477	164172	273273	251267	163163	314316	380382	407409
M28	Maui	229259	202202	248256	262266	220220	301301	429433	224228	322334	426426	457485	168170	275283	251251	159159	308310	366384	411411
M29	Maui	223259	202202	248248	270270	220220	301301	429433	218228	308334	426430	465499	164168	273273	251269	153161	310310	384386	411413
M30	Maui	223259	202204	248256	266266	218220	301301	429433	234234	318322	426428	457473	164172	273275	251269	161161	308310	384386	401413
M31	Maui	223259	202202	248256	262274	222222	301301	433433	234234	308330	426428	465489	168172	273273	251267	153159	312312	384386	409411
O19	Oahu	257257	202202	248256	266270	220226	301301	433433	218230	330332	426428	457457	172172	273273	267271	163163	310312	380386	417421
O20	Oahu	223229	202202	248248	258266	220234	301301	433433	222230	318320	426426	457475	164168	273273	251265	153159	312314	378380	409413
O21	Oahu	221257	202202	248256	274274	220224	0	0	0	318322	426428	0	164168	273273	251275	163163	312312	378380	0
O22	Oahu	219219	202202	248248	270274	220220	301301	433433	228230	318318	426426	487487	164164	273273	271275	159163	314314	378384	413421
O23	Oahu	257257	202202	248256	266266	218218	301301	433433	230230	318318	426428	487487	164164	273273	267271	159163	310312	378380	421421
O24	Oahu	221257	202202	248256	266270	220230	301301	433433	228230	316334	426428	473487	164172	273273	251275	159163	312314	378386	389417
O25	Oahu	217219	202202	248248	274274	218218	301301	433433	230230	318332	426426	457487	164172	273273	251251	163163	312316	378380	413421
O26	Oahu	219257	202204	248256	270274	218224	301301	433433	230236	318322	426428	477487	164168	273273	251271	159163	310312	378378	421421
O27	Oahu	219257	202202	248248	262270	220220	301301	433433	230232	322322	426426	471477	164182	273273	251267	153163	310312	378378	421421
O28	Oahu	257257	202202	248248	262270	220226	301301	433433	228232	318334	426426	473485	164164	273273	269271	159159	310312	380384	409411
M32	Maui	259259	202202	248256	266270	218234	301301	433433	224234	308332	426428	465483	164182	273273	265271	153159	310312	380386	411413
M33	Maui	229259	202202	248252	270274	220220	301301	433433	218228	308334	426426	475489	164178	273283	267271	153163	312312	384386	411421
M34	Maui	223259	202202	248256	266270	220234	301301	433433	228234	318322	426428	465473	164168	273273	267271	159163	310310	380384	411421
M35	Maui	257257	202202	248248	270270	222222	301301	433433	224228	318322	426426	475479	156168	273273	267269	159161	312316	384386	417421
H18	Hawaii	257257	202202	248248	258270	220222	301301	433433	224228	326326	426428	471471	164164	273273	249275	159163	314316	380380	407411
H19	Hawaii	241257	202202	248248	262278	220228	301301	433433	218228	318320	426426	457477	164168	273275	269271	159159	308314	380388	405409
H20	Hawaii	257257	202202	248248	270274	220220	301301	429433	228228	318320	426428	469477	164166	273275	265267	159159	312314	384386	405411
H21	Hawaii	257257	202202	248248	270274	224224	301301	429433	228232	324326	428428	467471	164172	273273	265269	153159	312314	356382	413425
H22	Hawaii	221257	202202	248248	258266	222222	301301	433433	228228	320322	428428	471483	164164	273273	267269	153163	312316	378380	405407
O29	Oahu	219257	202202	248248	266274	222222	301301	433433	230232	322322	426426	471477	164182	273273	251267	153163	310312	378378	421421
O30	Oahu	219231	202202	248248	270270	220224	301301	433433	228230	316336	426426	457487	172172	273273	271275	163163	314316	378378	421421
O31	Oahu	219259	202202	248248	266270	220222	301301	433433	230234	322332	426426	457457	168172	271273	267271	163163	310314	380384	421421
O32	Oahu	219259	202204	248248	266270	218222	301301	433433	230236	308318	426426	465487	164168	273273	265275	159163	310312	384386	417417
O43	Oahu	221271	202202	248248	270270	220220	301301	433433	228230	322322	426428	477477	164168	273273	251271	163163	314316	378384	421421
O34	Oahu	219259	202202	248256	262270	218220	301301	433433	228236	332336	426428	457457	172172	273283	251267	159163	310312	380384	413421
O40	Oahu	259259	202202	0	266270	220224	301301	433433	230236	308318	426426	465487	164168	273273	265275	159163	310312	384386	417417
M36	Maui	223229	202202	248252	270274	222222	301301	433433	218234	320328	426426	473489	164172	273275	251269	159159	310312	366384	401413
M37	Maui	251259	202202	252252	258270	220228	301301	433433	218228	322330	420438	471489	172182	273273	251267	153163	312312	366384	389413
M38	Maui	233259	202202	248248	270278	220226	301301	433433	218228	318322	426426	451457	164164	273273	267267	159163	310316	378384	409411
K6	Kauai	219259	202202	248248	270270	222228	301301	433433	230232	318324	426426	457477	168172	273273	269273	163163	312314	378378	411427
H36a	Hawaii	257257	202202	248248	258270	220224	301301	433433	226232	318320	426426	457475	164172	273275	267273	153159	314314	382384	415427
H1X	Hawaii	199231	202202	248248	266270	218220	301301	433433	218232	322324	426426	449451	164164	273275	267271	153163	312312	380384	411421
H24	Hawaii	257259	200200	248248	258258	224228	301301	429433	224234	320322	426426	449449	164168	273273	271271	159159	310310	380384	399421
M39	Maui	223257	202202	248256	266270	222222	301301	433433	228232	330334	426428	473495	164164	273273	267269	153159	310316	378384	411421
M40	Maui	229259	200202	248248	270270	222222	301301	429433	218218	318320	426426	471471	164172	273273	267271	153169	312316	386386	425427
M41	Maui	251259	202202	248256	258270	222230	301301	433433	218228	318322	426428	469475	156172	273273	251267	159159	310312	380386	413425
M42	Maui	233259	202202	248248	270274	222226	301301	433433	228232	330334	426426	473485	164168	273273	251251	159159	310312	380386	421421
M43	Maui	219259	202202	248248	266270	220224	301301	429433	224232	328328	426430	0	164168	273273	269271	153159	310310	386386	409427
M44	Maui	223259	202202	248256	266270	222236	301301	429433	224232	308330	426428	475475	170178	273275	251263	153153	312316	366386	413421
O36	Oahu	219219	202202	248248	266270	222226	301301	433433	228230	322322	426426	471477	168182	273273	251271	159163	312314	380384	421421
O37	Oahu	219271	202202	248248	262266	220224	301301	433433	230230	330334	426428	473487	164164	273273	271275	163163	310312	378380	421421
O38	Oahu	215229	202202	248248	270274	218220	301301	433433	228230	318318	426426	473487	164172	273273	251271	163163	316316	378386	417421
M45	Maui	229259	202202	248248	258274	220224	301301	433433	218228	330336	426426	451487	164168	273273	251267	153153	312316	378382	399413
M46	Maui	223259	200202	248256	270270	222236	301301	433433	224234	322334	426428	471471	164164	273273	271271	159159	310316	378380	409413
M47	Maui	219259	202202	248248	258266	220224	301301	433433	224236	328334	426426	451483	170172	273273	251267	159163	310310	384386	401427
M48	Maui	229233	200202	248248	258270	218220	301301	433433	218228	322324	426426	465483	168170	273273	263267	153159	312316	384386	401421
M49	Maui	247259	202202	248248	266270	218220	301301	433433	228232	318330	426430	451473	168172	273283	251267	163169	316316	380384	401413
M50	Maui	239239	202202	248248	270274	220222	301301	433433	218218	330334	426426	483489	170172	273273	267271	153153	310312	380384	409413
M51	Maui	257257	202202	248248	270274	222222	301301	433433	218234	318318	426426	475489	156164	273273	267269	153159	312316	378384	409413
H25	Hawaii	227257	202202	248256	266270	222226	301301	433433	228228	318322	426428	469471	164164	273273	267271	159159	310316	382384	397399
M100	Maui	235259	202202	248248	266270	218220	301301	433433	228232	0	0	0	164172	273273	267269	153159	310310	384386	421421
M50B	Maui						301301	429433	228232	330330	426428	485485	164172	273275	251271	153161	308310	380384	413421
M51B	Maui						301301	433433	228234	318334	426426	473473	164172	273273	251267	153159	308314	378384	409411
M52	Maui	257259	202202	248248	266270	220224	301301	433433	222228	330330	426426	463477	172172	273275	267269	159159	308308	378384	401411
M53	Maui	247257	202202	248248	266274	218220	301301	433433	232232	308322	426426	483483	170170	273273	267267	153161	308310	378384	411413
M54	Maui	237259	202202	248248	266270	218220	301301	433433	218234	330330	426426	479483	164170	273275	251267	153159	308310	380382	411411
M55	Maui	229253	202202	248252	270270	218220	301301	433433	228232	322326	426438	457483	164170	273283	267269	153159	310312	380380	409413
M56	Maui	253253	202202	248252	270270	226228	301301	433433	218222	308322	428438	483483	170170	273273	251271	153161	308308	384386	401421
M57	Maui	237259	202204	248248	270270	220220	0	0	0	318322	426426	473473	172172	273273	251267	153159	308310	384386	401421
M58	Maui	223257	202204	248256	258270	220224	301301	433433	234234	322334	428428	457477	164168	273273	267271	159163	310310	380386	401409
M59	Maui	257257	200202	248248	258266	218218	301301	433433	228232	318332	426434	457485	164164	273273	267269	153159	310310	386386	409427
M60	Maui	237259	202204	248248	266270	220220	301301	429433	228232	318330	426426	485487	164164	273275	251271	153159	308308	384384	411421
M61	Maui	229253	202202	248248	266266	218224	301301	429433	234234	318330	426428	473475	170172	273275	251271	153159	308308	384384	413413
O44	Oahu	219271	202204	248248	270270	228228	301301	433433	228230	318320	426428	485487	164164	273273	275275	163163	312314	380386	421421
O45	Oahu	219221	202202	248248	262266	218222	301301	433433	228230	322330	426426	457471	172182	273273	251275	159163	312312	378378	421421
O46	Oahu	257271	202202	248256	270274	218224	301301	433433	218226	318322	426428	477487	164168	273273	251271	159163	312314	378386	417417
O47	Oahu	257257	202204	248256	266270	218218	301301	433433	228230	318330	426428	457487	164172	273273	251275	159159	312316	378378	421421
M62	Maui						301301	429433	232232	324330	426426	451471	164170	273275	251251	153159	310314	386386	413413
M63	Maui	229259	202202	248248	262266	218218	301301	433433	222228	322330	426426	473485	164170	273273	251267	159161	308310	380386	427427
M64	Maui	229259	202202	248248	258266	218220	301301	429433	228228	334334	426426	473499	164164	273275	251267	153159	310310	384386	401409
M65	Maui	237237	202202	248248	262266	218220	301301	433433	224232	308322	426426	475481	164170	273273	265271	153161	308314	380386	409417
M66	Maui	259259	202202	248256	270274	218218	301301	433433	218236	316328	426428	465487	164172	273273	267271	153159	310310	380386	421421
M67	Maui	223241	202202	248256	270270	228234	301301	433433	228234	318322	426428	457471	164172	273273	251271	159159	308310	384386	411411
M68	Maui	229229	202202	248248	270270	220220	301301	433433	222232	318322	426426	457473	164172	273273	269271	159163	312312	380384	421421
M72	Maui	253257	202202	248248	270270	220226	301301	433433	224228	320330	426428	457479	164164	273273	251271	153159	310312	378386	409411
M73	Maui	233259	202202	248248	266266	220220	301301	433433	218234	320322	426426	457473	164172	273273	269269	153163	310312	380384	401413
M78	Maui	239257	202202	248248	270274	218220	301301	433433	218228	330334	426426	475489	164170	273273	265265	153159	312312	384384	401413
H27	Hawaii	229257	202204	248248	270274	218220	301301	433433	222232	318332	426426	475475	156164	273273	267269	159159	310314	378380	411421
H28	Hawaii	257257	202202	248248	266270	222222	301301	433433	218236	318320	426426	451475	170170	273273	251267	153153	314314	378382	411421
H29	Hawaii	227257	202202	248248	266270	220220	301301	433433	232232	320330	426426	475481	164170	273273	251265	153163	314318	382384	411419
H2X	Hawaii	247259	202202	248248	266266	220228	301301	433433	228230	320322	426426	473485	164164	273273	249271	159159	308314	380382	399409
H30	Hawaii	199257	202202	248248	258274	218224	301301	433433	234236	326326	426426	449451	164172	273273	265267	159159	312316	382386	401409
H31	Hawaii	229229	202202	248248	266270	218224	301301	429433	218226	318322	426426	475529	164164	273273	269271	159163	312314	380382	409421
H32	Hawaii	227257	202204	248248	258270	220226	301301	433433	232234	322322	426428	467481	164164	273273	267271	159159	312312	378380	405413
H33	Hawaii	221257	202202	248248	270270	218220	301301	425433	218222	320332	426430	475475	156166	273273	251269	159159	310314	380384	399413
H34	Hawaii	239257	202202	248248	270270	220222	0	0	0	318322	426426	477477	164164	273273	267267	159163	316316	378386	409411
H35	Hawaii	233265	202202	248248	258270	222224	301301	433433	230236	318322	424426	471471	164168	273273	271271	159159	310314	380382	419421
H36B	Hawaii	221231	202202	248248	270270	218222	301301	433433	226228	324330	426426	475475	164172	273273	269271	153159	310314	380382	405409
H37	Hawaii	257257	196204	248248	262262	218226	301301	429433	218218	318326	426428	469481	164164	273273	269271	153159	312312	382382	399417
M101	Maui	253259	202202	248248	266266	218220	301301	433433	228228	0	0	0	170172	273283	251271	159159	310310	384386	399409
M102	Maui	229259	202202	248248	270274	226228	301301	429433	224232	322334	426426	481487	164164	273273	251251	159159	308310	366384	401413
M69	Maui	241259	202202	248248	270270	218226	301301	433433	228228	320334	426426	475487	164172	273273	267267	153159	308308	380382	413419
M70	Maui	259259	202202	248248	270270	220226	301301	433433	218228	308322	426426	457487	164172	273273	251269	153159	310310	380386	413425
M71	Maui	229259	202202	248248	266270	220220	301301	429433	228234	330334	426426	471473	164168	273283	267271	163169	310312	380386	401413
M74	Maui	223259	200204	248248	258270	220228	301301	433433	228228	308330	426426	475485	164178	273273	251269	159159	310312	378386	409421
M75	Maui	251259	202202	248248	266270	218220	301301	433433	222228	328330	426428	473485	164168	273273	267267	153159	310312	378386	409415
M76	Maui			248256	258270	218220	301301	433433	228236	308334	426428	463473	164172	273273	267267	159159	310312	384384	413421
O50	Oahu	219257	202202	248256	274274	218218	301301	433433	226228	318322	426428	477487	164168	273273	251251	159163	312312	378386	421421
O51	Oahu	219257	202202	248256	274274	218224	301301	433433	218232	332332	426428	457457	172172	273273	251271	163163	312312	378386	417421
O52	Oahu	259271	202202	248248	266274	218224	301301	433433	226230	318318	426428	473487	164172	273273	267271	163163	310312	378384	389421
O53	Oahu	257271	202204	248248	266266	218224	301301	433433	230232	316318	426428	487487	164172	273273	267275	159163	312316	378384	389421
O54	Oahu	219221	202202	248248	270274	218224	301301	433433	226230	318332	426426	457487	164172	273273	251271	163163	312316	378380	421421
O55	Oahu	221227	202202	248248	274274	220222	301301	433433	230230	322330	426430	457477	168172	273273	251275	163163	312312	378378	421421
H38	Hawaii	221247	202204	248248	258258	220230	301301	433433	228232	322322	426426	471471	164164	273273	267271	159159	308312	384384	405421
H39	Hawaii	219223	202204	248248	266270	226228	301301	429433	224226	318326	426428	475477	164164	273273	271271	159159	316316	380382	405409
H3X	Hawaii	225233	202202	248248	266270	220234	301301	429433	218226	318320	428432	477497	164172	273275	263271	153163	314316	378382	405409
H40	Hawaii	215259	202204	248248	266266	218228	301301	433433	218232	320322	426426	451473	168172	273273	267271	153159	314316	380386	399419
H41	Hawaii	257259	202202	248248	258262	218220	301301	433433	228234	320320	426426	457481	164164	273273	267271	153159	314316	380386	401411
H42	Hawaii	221243	202202	248248	274274	220224	301301	433433	228236	320320	426426	473477	164170	273275	269271	153159	310316	378378	399409
M79	Maui	233259	202202	248248	270274	220224	301301	433433	218234	322330	426430	471475	170182	273273	251271	159159	312312	380384	409413
M80	Maui	253257	202202	248248	270274	220220	301301	433433	228228	328334	426426	473495	164164	273273	269269	159163	310312	378384	409409
M81	Maui	215223	202204	248256	266274	218220	301301	433433	228228	330334	428428	451473	164168	273273	251267	153159	312312	366384	401409
M82	Maui	253257	200202	248256	270270	218220	301301	433433	228234	322334	426428	457473	164172	273273	251267	153163	316316	384386	401409
M83	Maui	229259	202202	248248	270274	220224	301301	433433	228232	308328	426426	465475	168170	273273	251267	159159	312316	378386	409413
M84	Maui	239257	202202	248248	266270	220234	301301	433433	232232	318322	426426	471473	164182	273273	265267	153159	310316	366386	411421
M85	Maui	229257	200202	248248	266270	220220	301301	433433	228234	318330	426428	451457	164168	273275	267269	153159	312312	384386	409411
M86	Maui	229257	202202	248248	266270	220224	301301	429433	224228	334334	426426	473487	164168	273273	251269	159163	310312	380384	421425
M87	Maui	229259	202202	248248	270278	218220	301301	433433	232232	308330	426428	465475	168170	273273	251271	159163	310312	378386	413415
M88	Maui	223241	202202	248256	266270	220220	301301	433433	218234	316322	426426	487497	172172	273273	267267	159159	310316	382386	401421
K10	Kauai	257259	202202	248248	270274	224226	301301	433433	232232	324330	426428	457487	164172	273273	267267	159163	310312	384386	413427
H43	Hawaii	257257	202202	248248	270270	218218	301301	433433	228234	318326	426428	471471	164168	273273	265269	159163	314314	378384	405409
H44	Hawaii	199259	202202	248248	270270	218220	301301	433433	228232	320320	426426	455471	164172	273273	251271	153159	310312	378382	407409
H45	Hawaii	229257	202202	248248	258274	218232	301301	429433	232232	322322	426426	469479	164164	273273	251271	153159	314316	380380	405427
H46	Hawaii	229247	202202	248248	266266	218218	301301	429433	230230	326330	426426	455469	164174	273273	249269	159163	310312	382384	401419
H47	Hawaii	221257	202202	248248	258270	218222	301301	433433	226232	318326	426426	449473	170172	273273	269271	159159	312314	378382	405411
H48	Hawaii	217223	202202	248248	262274	220220	301301	433433	218226	320320	426428	461475	164170	273283	267269	153153	314316	380384	405409
H49	Hawaii	221257	202202	248248	266266	218222	301301	433433	226228	314318	424426	469477	164164	273273	267267	159163	314314	380384	401409
H50	Hawaii	231253	202202	248248	270270	210220	301301	433433	228232	320330	426428	457477	164164	273273	269271	159163	314316	380382	399427
H51	Hawaii	257257	202204	248256	262274	220220	301301	433433	228232	320330	424426	477479	164164	273275	251271	153159	312314	378386	405411
H52	Hawaii	257267	202202	248248	262274	218224	301301	433433	224224	318322	426426	449475	164170	273273	0	153157	312318	378386	0
H53	Hawaii	237259	202202	248248	262266	220224	301301	433433	218224	318326	426426	471471	164172	273273	269271	153163	312316	356380	405405
H54	Hawaii	199257	202202	248248	266270	218218	301301	433433	230232	320320	428430	477499	164164	273273	271271	159159	312316	384388	401413
H55	Hawaii	225259	202202	248248	258262	218224	301301	433433	218230	318330	426426	473477	168174	273273	267271	153159	310314	380384	397405
H56	Hawaii	233259	202202	248248	266270	218222	301301	429433	218228	318320	426428	477477	164172	273273	265269	159159	312314	380380	401405
H57	Hawaii	235257	202206	248248	266270	216220	301301	433433	226234	314322	426428	449473	164164	273273	269269	159163	310314	380386	405427
H58	Hawaii	229257	202202	248248	266270	218218	301301	433433	218228	318330	426428	475475	172172	273273	251269	153159	312314	384386	419419
H59	Hawaii	215231	198202	248256	266278	216222	301301	427433	226232	318318	426426	455479	164166	273275	267271	153163	310312	378382	409415
H60	Hawaii	229259	202202	248248	258258	218220	301301	433433	232234	318320	426426	473475	164164	273273	267269	159159	312314	380384	411413
H61	Hawaii	253257	202202	248256	258274	222224	301301	429433	218224	318318	428428	471475	164164	273273	269273	163163	314314	380382	405405
H62	Hawaii	225259	202202	248248	258274	218224	301301	433433	228234	318318	426428	449469	164164	273285	265267	159159	312316	370380	399399
K11	Kauai	219259	202202	248248	266266	222222	301301	433433	226232	322324	426426	457473	172172	273283	271271	159163	312316	366386	413421
H63	Hawaii	223259	202202	248248	258258	218222	301301	429433	234238	318320	426426	465465	168172	273273	267269	153163	308316	380384	399421
H64	Hawaii	219257	202202	248248	262270	218232	301301	433433	228230	318318	426428	449471	164164	273273	271271	159163	314318	382386	399405
H65	Hawaii	257259	202202	248248	258274	222222	301301	433433	224228	318318	426428	465477	164164	273273	251271	153163	314314	380380	401405
H66	Hawaii	257257	202202	248248	262266	218218	301301	433433	228230	322326	426428	477477	164164	273273	265271	159159	314314	378388	405413
H67	Hawaii	257257	202204	248248	266270	220222	301301	433433	232234	320322	426426	467467	164164	273273	269273	159159	310312	380386	407419
H68	Hawaii	221259	202202	248248	270274	222226	301301	429433	218232	314326	428430	471477	164164	273273	269271	159163	316316	380382	405407
H69	Hawaii	257257	202202	248248	266270	218222	301301	429433	218234	318322	426428	449455	164168	275275	265269	159163	312316	380384	401405
H70	Hawaii	257257	202202	248248	258270	218220	301301	429433	224232	318330	426428	471477	164172	273275	267271	159163	310314	378384	405409
H71	Hawaii	217247	202208	248248	270274	218222	301301	433433	224228	324328	426430	463477	164164	273283	269271	159159	316320	380382	399409
H72	Hawaii	229259	202202	248252	266270	218218	301301	433433	218234	320322	426432	455471	166168	273273	265271	153163	312314	380388	407421
H73	Hawaii	231235	202204	248248	270278	222222	301301	429433	218234	320322	426428	451451	168168	273273	267271	159163	316316	380386	409409
H74	Hawaii	233257	202202	248248	258270	218220	301301	429433	224230	318318	426428	467479	164164	273275	249273	153153	314314	378384	409411
H75	Hawaii	223257	202202	248248	258270	216218	301301	429433	222232	318320	426426	479483	164172	273275	267269	159163	314316	380382	409409
H76	Hawaii	199257	202204	248248	266266	218220	301301	433433	230232	318320	426426	473477	164164	273273	269271	159163	310316	380382	401415
H77	Hawaii	257257	202202	248248	258258	220222	301301	429429	218228	320320	426426	471477	164164	275275	267269	159159	312316	380384	419421
H78	Hawaii	219257	202208	248248	258270	218222	301301	425433	224228	320322	426428	471473	156168	273273	271275	159159	314314	380382	399411
H79	Hawaii	257259	202202	248248	262266	220226	301301	433433	218232	318330	426426	475481	164172	273275	265269	159159	312320	356388	397413
H80	Hawaii	215257	202202	248256	258266	218228	301301	433433	228234	320322	426426	473473	164164	273275	263267	153163	314314	384390	399409
H81	Hawaii	229257	202202	248248	258270	220222	301301	429433	218228	324330	426426	455477	164168	273275	251269	153159	310316	378386	403411
H82	Hawaii	247257	200208	248256	266270	218224	301301	433433	218224	320320	426430	467477	172172	273273	265267	159163	316316	380386	405407
H83	Hawaii	217259	202202	248248	258270	220224	301301	433433	226234	318320	426428	479483	164170	273273	269271	159159	314316	380380	409411
H84	Hawaii	229257	202202	248248	266270	220220	301301	433433	218218	318326	424432	471477	164172	273273	267267	153163	312314	380384	409421
H85	Hawaii	233259	202202	248248	270270	218222	301301	433433	232236	320324	426426	449471	164164	273273	267271	159159	312314	380380	401419
H86	Hawaii	257257	202202	248248	266270	220232	301301	433433	224228	318320	426426	449471	156164	273273	271273	159159	310310	380384	409419
H87	Hawaii	247265	202202	248248	266274	218220	301301	433433	230232	318322	426426	473475	168172	273273	251267	153159	314314	384388	405419
H88	Hawaii	257257	202202	248248	258266	218230	301301	433433	228228	320320	426430	471479	156164	273273	251273	153159	314314	380384	401419
H89	Hawaii	225257	202202	248248	258258	220220	301301	425433	222228	316318	426430	473477	164164	273273	269269	159159	308314	378384	405411
H90	Hawaii	199257	202202	248248	258270	218220	301301	433433	222232	320320	424426	473483	164172	273273	259267	153159	310316	366386	405409
H91	Hawaii	257257	202204	248248	266270	218218	301301	433433	222228	320330	426428	451475	164172	273275	269269	153159	312314	380384	407411
H92	Hawaii	257257	202204	248248	258270	222226	301301	433433	228232	314318	426426	471481	164172	273273	267271	153159	312314	378384	399411
H93	Hawaii	227257	202204	248248	266266	210228	301301	433433	218224	326330	426428	469475	170172	273273	267267	153159	312314	384386	405413
H94	Hawaii	215257	202202	248256	258262	218220	301301	429433	232236	318326	426426	451481	164168	273273	265267	153153	312316	380382	409409
K12	Kauai	219255	202202	248248	270270	226228	301301	433433	232232	324330	426426	471473	168172	273273	251267	153153	316316	378378	417425
K13	Kauai	219271	202204	248248	262274	222228	301301	433433	230232	318324	426426	457457	172172	273273	269271	163163	312312	378378	411417
K14	Kauai	271271	202202	248248	266266	222222	301301	433433	232232	318324	426426	457457	162172	273273	269275	163163	310312	378378	413417
K15	Kauai	219231	202202	248248	266270	218220	301301	433433	230236	322330	426426	473499	164168	273273	271273	163163	312312	378386	411417
K16	Kauai	259271	202202	248248	262262	220226	301301	433433	228230	318330	426428	457485	164172	273273	267275	159163	312314	378386	413421
K17	Kauai	225231	202202	248248	270270	218218	301301	433433	232232	322330	426426	473499	164164	273273	251275	153153	312312	378380	413421
K18	Kauai	219259	202204	248248	270270	218218	301301	433433	232232	330330	426426	473473	164168	273273	275275	163163	312312	378378	411421
K19	Kauai	219271	202202	248248	262270	226226	301301	433433	230232	318330	426426	457483	172172	273273	267275	153163	312316	378386	421425
K7	Kauai	219257	202202	248248	266270	218228	301301	433433	228230	324330	426426	457489	164172	273273	269273	153163	312316	380386	411427
K8	Kauai	259271	202202	248248	274274	218228	301301	433433	218228	318330	426426	457487	164172	273273	267269	163163	312316	378380	421425
K9	Kauai	219225	202202	248248	270274	218222	301301	433433	230236	330334	426426	457457	162172	273273	251273	163163	312316	378388	427427
M89	Maui	229245	202202	248256	266274	220224	301301	433433	218234	326330	426426	457487	164172	273273	267271	153159	310312	384386	409409
M90	Maui	229259	200202	248248	266266	220220	301301	429433	234234	190202	426426	457485	164164	273273	267271	153159	310316	382384	403409
M92	Maui	253259	202202	248252	266270	220220	301301	433433	234234	318330	426438	451485	164164	273273	251267	159159	312312	384384	389411
M93	Maui	213259	202202	248252	266270	220220	301301	433433	224228	322322	420426	483495	170172	273273	251271	159159	312312	384384	419421
M94	Maui	259259	202204	248256	270270	220224	301301	433433	218218	322326	426426	457473	164164	273283	251271	159159	310312	380380	413421
M95	Maui	247253	202202	248248	258270	220228	301301	429433	232232	322330	426426	473479	172172	273273	251271	153159	310316	386386	413421
M96	Maui	223253	202204	248248	270270	220220	301301	433433	224228	324332	426428	457473	164164	273273	251269	153159	312316	384386	409413
M97	Maui	259259	202202	248248	270270	218220	301301	433433	228232	322330	426426	457495	164168	273273	267267	153163	312312	378384	417421
M98	Maui	259259	202202	248248	270274	220220	301301	433433	218224	322322	426426	465483	164170	273273	251267	163169	310312	380380	411413
M99	Maui	257259	202202	248248	266270	226228	301301	433433	218224	308316	426426	475487	172178	273273	251265	153159	310312	384384	413413
H118	Hawaii	257257	202202	248248	258270	218224	301301	433433	218218	314320	426426	457471	164164	273273	269273	153159	310312	378380	409409
O56	Oahu	217219	202202	248248	270270	218224	301301	433433	230236	318318	426426	487487	164164	273273	271271	163163	312316	378386	421421
M103	Maui	229229	202202	248256	266270	228228	301301	429433	228232	330330	426428	451471	164168	273275	251269	159159	316316	384386	401409
M104	Maui	257257	202202	248256	266270	228228	301301	433433	222228	324334	426426	473487	164164	273273	251251	153159	312312	384384	421421
