# Supplementary material for: Genetic diversity, structure, and effective population size of an endangered, endemic hoary bat, ʻōpeʻapeʻa, across the Hawaiian Islands
Source: PeerJ. 2023 Jan 25;11:e14365. doi: 10.7717/peerj.14365 (PMC9884036; doi:10.7717/peerj.14365)
Supplement: Supplemental Information 15 — Collection details for each individual, coordinates and groupings for IBD testing, groupings for sex biased dispersal testing. [file peerj-11-14365-s015.xlsx]

## Sheet: Hawaiian hoary bat tissue colle
USGS Genetic ID	Year	Island	Site Name	Site Location	Specimen Type	Sex	Genetic Sex Determination	CO1 Result	Pinzari GB Accession	Russell GB Accession	Baird GB Accession	BPBM Accession	Msat Result	USGS Bat ID
M23	1988	Maui	Makawao Avenue	Private - Kula	Carcass	U	no	no				177155	yes
M24	1989	Maui	Wailea	Private - Kihei	Carcass	F	no	no				178067	yes
M22	1999	Maui	Kohala Street	Private - Kihei	Carcass	U	no	no				184307	yes
M25	1999	Maui	Kihei	Private - Kihei	Carcass	M	no	no				184308	yes
HD02_FJB01	2005	Hawaii	Amauulu Road	Private—Hilo	Capture	M	no	yes		KR350020			no	2005HHB016
HD03_FJB02	2005	Hawaii	Amauulu Road	Private—Hilo	Capture	M	no	yes		KR350021			no	2005HHB017
HD05_FJB03	2005	Hawaii	Amauulu Road	Private—Hilo	Capture	F	no	yes		KR350022			no	2005HHB015
HD01_FJB04	2005	Hawaii	Island Princess	Private—Keaau	Capture	M	no	yes		KR350023			no	2005HHB013
H151.306_FJB37	2006	Hawaii	Umikoa	Private—Ookala	Capture	M	no	yes		KR350056			no	2006HHB007
H164.528_FJB35	2006	Hawaii	Umikoa	Private—Ookala	Capture	F	no	yes		KR350054			no	2006HHB006
H164.555_FJB36	2006	Hawaii	Umikoa	Private—Ookala	Capture	F	no	yes		KR350055			no	2006HHB003
H164.605_FJB49	2006	Hawaii	Amauulu Road	Private—Hilo	Capture	F	no	yes		KR350066			no	2006HHB002
H164.668_FJB38	2006	Hawaii	Umikoa	Private—Ookala	Capture	F	no	yes		KR350057			no	2006HHB004
H164.694_FJB52	2006	Hawaii	Amauulu Road	Private—Hilo	Capture	F	no	yes		KR350067			no	2006HHB001
H164.630-2_FJB39	2006	Hawaii	Umikoa	Private—Ookala	Capture	F	no	yes		KR350058			no	2006HHB005
H1_FJB05	2007	Hawaii	E Ohea Street	Private—Hilo	Carcass	M	no	yes		KR350024		185079	no
H108_FJB06	2008	Hawaii	Flume Road	State—Upper Waiakea Forest Reserve, Timber Management Area	Capture	M	no	yes		KR350025			no	2008HHB001
H208_FJB07	2008	Hawaii	Amauulu Road	Private—Hilo	Capture	F	no	yes		KR350026			no	2008HHB002
K2_FJB24	2008	Kauai	Hanalei	Private - Hanalei	Carcass	M	no	yes		KR350043		185240	yes
K1_FJB09	2009	Kauai	Kokee Road	Private - Kokee	Carcass	M	no	yes		KR350028	MF990064	185478	yes
H109_FJB08	2009	Hawaii	Amauulu Road	Private—Hilo	Capture	F	no	yes		KR350027			yes	2009HHB001
H209_FJB10	2009	Hawaii	Island Princess	Private—Keaau	Capture	F	no	yes		KR350029			no	2009HHB002
H309_FJB11	2009	Hawaii	Island Princess	Private—Keaau	Capture	M	no	yes		KR350030			no	2009HHB003
H409_FJB12	2009	Hawaii	Island Princess	Private—Keaau	Capture	M	no	yes		KR350031			no	2009HHB004
H509_FJB13	2009	Hawaii	Island Princess	Private—Keaau	Capture	F	no	yes		KR350032			no	2009HHB005
H609_FJB14	2009	Hawaii	Island Princess	Private—Keaau	Capture	M	no	yes		KR350033			no	2009HHB006
H709_FJB55	2009	Hawaii	Island Princess	Private—Keaau	Capture	F	no	yes		KR350069			no	2009HHB007
H809_FJB15	2009	Hawaii	Amauulu Road	Private—Hilo	Capture	M	no	yes		KR350034			no	2009HHB008
H909_FJB16	2009	Hawaii	Amauulu Road	Private—Hilo	Capture	M	no	yes		KR350035			no	2009HHB009
H1009_FJB17	2009	Hawaii	Amauulu Road	Private—Hilo	Capture	F	no	yes		KR350036			no	2009HHB010
H1109_FJB53	2009	Hawaii	Amauulu Road	Private—Hilo	Capture	F	no	yes		KR350068			no	2009HHB011
H1209_FJB56	2009	Hawaii	Island Princess	Private—Keaau	Capture	M	no	yes		KR350070			no	2009HHB012
H1309_FJB57	2009	Hawaii	Island Princess	Private—Keaau	Capture	F	no	yes		KR350071			no	2009HHB013
H1609_FJB58	2009	Hawaii	Island Princess	Private—Keaau	Capture	M	no	yes		KR350072			no	2009HHB016
H1409	2009	Hawaii	Amauulu Road	Private—Hilo	Capture	M	no	yes	OL894246				yes	2009HHB014
M2_FJB18	2009	Maui	Kihei	Private - Kihei	Carcass	F	yes	yes		KR350037			yes
M1_FJB19	2009	Maui	Kipahulu	Federal - Haleakala National Park	Carcass	F	no	yes		KR350038	MF990065	185479	yes
H1509	2009	Hawaii	Amauulu Road	Private—Hilo	Capture	M	no	yes	OL894248				yes	2009HHB015
H3	2009	Hawaii	Wainaku	Private—Hilo	Carcass	M	no	yes	OL894287				yes
H510_FJB22	2010	Hawaii	Laupahoehoe	State—Laupahoehoe Natural Area Reserve	Capture	M	no	yes		KR350041			no	2010HHB006
H710_FJB25	2010	Hawaii	Hakalau Maulua Tract	Federal—Hakalau Forest National Wildlife Refuge	Capture	F	no	yes		KR350044			yes	2010HHB008
H2210_FJB29	2010	Hawaii	J7 Ranch	State—Hilo Forest Reserve, Watershed Reserve Section	Capture	M	no	yes		KR350048			yes	2010HHB023
H110_FJB59	2010	Hawaii	Island Princess	Private—Keaau	Capture	F	no	yes		KR350073			no	2010HHB001
H310_FJB20	2010	Hawaii	Laupahoehoe	State—Laupahoehoe Natural Area Reserve	Capture	F	no	yes		KR350039			no	2010HHB003
H410_FJB21	2010	Hawaii	Laupahoehoe	State—Laupahoehoe Natural Area Reserve	Capture	M	no	yes		KR350040			no	2010HHB005
H810_FJB26	2010	Hawaii	Laupahoehoe	State—Laupahoehoe Natural Area Reserve	Capture	F	no	yes		KR350045			no	2010HHB009
H910_FJB41	2010	Hawaii	Laupahoehoe	State—Laupahoehoe Natural Area Reserve	Capture	F	no	yes		KR350060			no	2010HHB010
H1010_FJB42	2010	Hawaii	Laupahoehoe	State—Laupahoehoe Natural Area Reserve	Capture	F	no	yes		KR350061			no	2010HHB011
H1210_FJB44	2010	Hawaii	Laupahoehoe	State—Laupahoehoe Natural Area Reserve	Capture	F	no	yes		KR350062			no	2010HHB016
H1310_FJB45	2010	Hawaii	Laupahoehoe	State—Laupahoehoe Natural Area Reserve	Capture	F	no	yes		KR350063			no	2010HHB018
H1410_FJB46	2010	Hawaii	Laupahoehoe	State—Laupahoehoe Natural Area Reserve	Capture	F	no	yes		KR350064			no	2010HHB012
H1510_FJB47	2010	Hawaii	Laupahoehoe	State—Laupahoehoe Natural Area Reserve	Capture	F	no	yes		KR350065			no	2010HHB015
H1110	2010	Hawaii	Laupahoehoe	State—Laupahoehoe Natural Area Reserve	Capture	M	no	yes	OL894243				no	2010HHB017
M3_FJB23	2010	Maui	Kenolio Road	Private - Kihei	Carcass	F	yes	yes		KR350042		185520	yes
M5_FJB28	2010	Maui	Hawea Place	Private - Olinda	Carcass	F	no	yes		KR350047	MF990070	185541	yes
M4_FJB27	2010	Maui	Pukalani Community Center	Private - Kula	Carcass	M	yes	yes		KR350046		185496	yes
H1610	2010	Hawaii	Laupahoehoe	State—Laupahoehoe Natural Area Reserve	Capture	M	no	yes	OL894251				yes	2010HHB019
M7_FJB31	2010	Maui	Pukalani Terrace	Private - Kula	Carcass	F	yes	yes		KR350050	MF990068	185539	yes
H1710	2010	Hawaii	Laupahoehoe	State—Laupahoehoe Natural Area Reserve	Capture	F	no	yes	OL894253				yes	2010HHB014
H1810	2010	Hawaii	Laupahoehoe	State—Laupahoehoe Natural Area Reserve	Capture	M	no	yes	OL894255				yes	2010HHB013
H1910	2010	Hawaii	Laupahoehoe	State—Laupahoehoe Natural Area Reserve	Capture	F	no	yes	OL894257				yes	2010HHB021
H2010	2010	Hawaii	Laupahoehoe	State—Laupahoehoe Natural Area Reserve	Capture	M	no	yes	OL894260				yes	2010HHB020
H210	2010	Hawaii	Island Princess	Private—Keaau	Capture	M	no	yes	OL894262				yes	2010HHB002
H2110	2010	Hawaii	Laupahoehoe	State—Laupahoehoe Natural Area Reserve	Capture	F	no	yes	OL894264				yes	2010HHB022
H2211	2010	Hawaii	Laupahoehoe	State—Laupahoehoe Natural Area Reserve	Capture	F	no	yes	OL894266				yes	2010HHB036
H2212	2010	Hawaii	Laupahoehoe	State—Laupahoehoe Natural Area Reserve	Capture	F	no	yes	OL894267				yes	2010HHB035
H2213	2010	Hawaii	Laupahoehoe	State—Laupahoehoe Natural Area Reserve	Capture	M	no	yes	OL894268				yes	2010HHB024
H2214	2010	Hawaii	Laupahoehoe	State—Laupahoehoe Natural Area Reserve	Capture	M	no	yes	OL894269				yes	2010HHB034
H2215	2010	Hawaii	Laupahoehoe	State—Laupahoehoe Natural Area Reserve	Capture	M	no	yes	OL894270				yes	2010HHB037
H2216	2010	Hawaii	Laupahoehoe	State—Laupahoehoe Natural Area Reserve	Capture	M	no	yes	OL894271				yes	2010HHB033
H2217	2010	Hawaii	Laupahoehoe	State—Laupahoehoe Natural Area Reserve	Capture	F	no	yes	OL894272				yes	2010HHB032
H2218	2010	Hawaii	Laupahoehoe	State—Laupahoehoe Natural Area Reserve	Capture	F	no	yes	OL894273				yes	2010HHB031
H2219	2010	Hawaii	Laupahoehoe	State—Laupahoehoe Natural Area Reserve	Capture	F	no	yes	OL894274				yes	2010HHB030
H2220	2010	Hawaii	Laupahoehoe	State—Laupahoehoe Natural Area Reserve	Capture	M	no	yes	OL894275				yes	2010HHB029
H2221	2010	Hawaii	Laupahoehoe	State—Laupahoehoe Natural Area Reserve	Capture	F	no	yes	OL894276				yes	2010HHB028
H2222	2010	Hawaii	Laupahoehoe	State—Laupahoehoe Natural Area Reserve	Capture	M	no	yes	OL894277				yes	2010HHB027
H2223	2010	Hawaii	Laupahoehoe	State—Laupahoehoe Natural Area Reserve	Capture	M	no	yes	OL894278				yes	2010HHB026
H2224	2010	Hawaii	Laupahoehoe	State—Laupahoehoe Natural Area Reserve	Capture	F	no	yes	OL894279				yes	2010HHB025
H2225	2010	Hawaii	Laupahoehoe	State—Laupahoehoe Natural Area Reserve	Capture	F	no	yes	OL894280				yes	2010HHB039
H6_FJB30	2010	Hawaii	Hawi	Private - Hawi	Carcass	M	no	yes		KR350049	MF990069	185540	yes
H610	2010	Hawaii	Island Princess	Private—Keaau	Capture	M	no	yes	OL894326				yes	2010HHB007
H7	2010	Hawaii	Glover Road	Federal - Hawaii Volcanoes National Park, Kahuku Unit	Carcass	M	no	yes	OL894336				yes
H8_FJB40	2010	Hawaii	Kona Hema Papa	Private—Kona Hema Preserve, The Nature Conservancy	Carcass	M	yes	yes		KR350059			yes
H911	2011	Hawaii	Laupahoehoe	State—Laupahoehoe Natural Area Reserve	Capture	F	no	no					yes	2011HHB008
H1011	2011	Hawaii	Amauulu Road	Private—Hilo	Capture	F	no	yes	OL894242				yes	2011HHB009
H111	2011	Hawaii	Island Princess	Private—Keaau	Capture	M	no	yes	OL894244				yes	2011HHB002
O1_FJB33	2011	Oahu	Mililani Mauka	Private - Mililani	Carcass	F	yes	yes		KR350052			yes
O2_FJB34	2011	Oahu	Kahuku Wind Facility	Private - Kahuku	Carcass	F	yes	yes		KR350053			yes
M8_FJB60	2011	Maui	Haiku	Private - Haiku	Carcass	M	yes	yes		KR350074		185562	yes
M10_FJB62	2011	Maui	Kaheawa Wind Facility	Private - Kaheawa	Carcass	F	yes	yes		KR350076			yes
M9_FJB61	2011	Maui	Waikamoi	Private - Hana	Carcass	F	no	yes		KR350075			yes
H211	2011	Hawaii	Island Princess	Private—Keaau	Capture	M	no	yes	OL894263				yes	2011HHB001
H2226	2011	Hawaii	Laupahoehoe	State—Laupahoehoe Natural Area Reserve	Capture	M	no	yes	OL894281				yes	2010HHB038
H311	2011	Hawaii	Laupahoehoe	State—Laupahoehoe Natural Area Reserve	Capture	F	no	yes	OL894290				yes	2011HHB003
H511	2011	Hawaii	Laupahoehoe	State—Laupahoehoe Natural Area Reserve	Capture	M	no	yes	OL894315				yes	2011HHB004
H611	2011	Hawaii	Laupahoehoe	State—Laupahoehoe Natural Area Reserve	Capture	M	no	yes	OL894327				yes	2011HHB007
H711	2011	Hawaii	Laupahoehoe	State—Laupahoehoe Natural Area Reserve	Capture	F	no	yes	OL894339				yes	2011HHB006
H9_FJB32	2011	Hawaii	Painted Church Road	Private - Captain Cook	Carcass	F	no	yes		KR350051		185563	yes
H50112	2012	Hawaii	Island Princess	Private—Keaau	Capture	F	no	yes	OL894312				yes	2012HHB001
H50113	2012	Hawaii	Island Princess	Private—Keaau	Capture	M	no	yes	OL894313				yes	2012HHB002
H10	2012	Hawaii	Pepeekeo	Private - Hilo	Carcass	U	no	no					yes
O3_FJB63	2012	Oahu	Kahuku Wind Facility	Private - Kahuku	Carcass	M	yes	yes		KR350077			yes
O4_FJB64	2012	Oahu	Kahuku Wind Facility	Private - Kahuku	Carcass	F	yes	yes		KR350078			yes
O5	2012	Oahu	Kawailoa Wind Facility	Private - Kawailoa	Carcass	F	yes	yes	OL894492			185711	yes
M11	2010	Maui	No exact locality	Private - Unknown	Carcass	M	yes	yes	OL894380		MF990066	185519	yes
M12	2012	Maui	Keokea	Private - Keokea	Carcass	M	yes	yes	OL894381			185710	yes
H12	2013	Hawaii	Hilo	Private - Hilo	Carcass	F	no	yes	OL894245				yes
H15	2013	Hawaii	Kamaoa Road	Private - Kamaoa	Carcass	F	yes	yes	OL894247			185964	yes
M13	2013	Maui	Kaheawa Wind Facility	Private - Kaheawa	Carcass	M	yes	yes	OL894382			185769	yes
M14	2013	Maui	Kihei Elementary School	Private - Kihei	Carcass	F	yes	yes	OL894383				yes
M15	2013	Maui	Nakula Natural Area Reserve	State - Nakula Natural Area Reserve	Capture	M	no	yes	OL894384				yes	2013HHB001
M16	2013	Maui	Kaheawa Wind Facility	Private - Kaheawa	Carcass	M	yes	yes	OL894385				yes
M17	2013	Maui	Kaheawa Wind Facility	Private - Kaheawa	Carcass	M	yes	yes	OL894386				yes
M18	2013	Maui	Kaheawa Wind Facility	Private - Kaheawa	Carcass	F	yes	yes	OL894387				yes
O10	2013	Oahu	Waimea	Private - Waimea Valley Park	Carcass	F	yes	yes	OL894460				yes
O11	2013	Oahu	Kawailoa Wind Facility	Private - Kawailoa	Carcass	M	yes	yes	OL894461			185771	yes
O12	2013	Oahu	Kawailoa Wind Facility	Private - Kawailoa	Carcass	M	yes	yes	OL894462			185772	yes
O13	2013	Oahu	Kawailoa Wind Facility	Private - Kawailoa	Carcass	M	yes	yes	OL894463			185774	yes
O14	2013	Oahu	Kawailoa Wind Facility	Private - Kawailoa	Carcass	M	yes	yes	OL894464				yes
O15	2013	Oahu	Kawailoa Wind Facility	Private - Kawailoa	Carcass	M	yes	yes	OL894465				yes
O16	2013	Oahu	Kawailoa Wind Facility	Private - Kawailoa	Carcass	M	yes	yes	OL894466				yes
O17	2013	Oahu	Kawailoa Wind Facility	Private - Kawailoa	Carcass	M	yes	yes	OL894467				yes
O18	2013	Oahu	Kawailoa Wind Facility	Private - Kawailoa	Carcass	M	yes	yes	OL894468				yes
O6	2013	Oahu	Kawailoa Wind Facility	Private - Kawailoa	Carcass	M	yes	yes	OL894499			185712	yes
O7	2013	Oahu	Kawailoa Wind Facility	Private - Kawailoa	Carcass	F	yes	yes	OL894500				yes
O8	2013	Oahu	Kawailoa Wind Facility	Private - Kawailoa	Carcass	M	yes	yes	OL894501			185770	yes
O9	2013	Oahu	Ukoa Pond	Private - Haleiwa	Carcass	F	yes	yes	OL894502			185773	yes
M19	2013	Maui	Mililani Place	Private - Kihei	Carcass	M	yes	yes	OL894388				yes
M20	2013	Maui	Kaheawa Wind Facility	Private - Kaheawa	Carcass	F	yes	yes	OL894389				yes
M21	2013	Maui	Auwahi Wind Facility	Private - Auwahi	Carcass	F	yes	yes	OL894390				yes
M27	2013	Maui	Kaheawa Wind Facility	Private - Kaheawa	Carcass	M	yes	yes	OL894391				yes
H16	2013	Hawaii	Kiono Street	Private - Waimea	Carcass	M	no	yes	OL894250			186116	yes
H17	2013	Hawaii	Honaunau	Federal - Puuhonua O Honaunau National Historical Park	Carcass	F	no	yes	OL894252				yes
HMU1	2013	Hawaii	Mummy Cave	State - Mauna Loa Forest Reserve	Carcass	M	yes	yes	OL894241				yes
H1511	2014	Hawaii	Kaloko-Honokohau NHP	Federal—Kaloko-Honokohau National Historic Park	Capture	M	yes	yes	OL894249				yes	2014HHB001
M28	2014	Maui	Kaheawa Wind Facility	Private - Kaheawa	Carcass	M	yes	yes	OL894392			185992	yes
M29	2014	Maui	Kaheawa Wind Facility	Private - Kaheawa	Carcass	F	yes	yes	OL894393				yes
M30	2014	Maui	Hawea Place	Private - Olinda	Capture	M	yes	yes	OL894394				yes	2014HHB002
M31	2014	Maui	Kahoku Place	Private - Kihei	Carcass	F	yes	yes	OL894395			185965	yes
O19	2014	Oahu	Kawailoa Wind Facility	Private - Kawailoa	Carcass	F	yes	yes	OL894469				yes
O20	2014	Oahu	Kawailoa Wind Facility	Private - Kawailoa	Carcass	M	yes	yes	OL894470				yes
O21	2014	Oahu	Kahuku Wind Facility	Private - Kahuku	Carcass	M	no	yes	OL894471				yes
O22	2014	Oahu	Kawailoa Wind Facility	Private - Kawailoa	Carcass	M	yes	yes	OL894472				yes
O23	2014	Oahu	Kawailoa Wind Facility	Private - Kawailoa	Carcass	M	yes	yes	OL894473				yes
O24	2014	Oahu	Kawailoa Wind Facility	Private - Kawailoa	Carcass	F	yes	yes	OL894474				yes
O25	2014	Oahu	Kawailoa Wind Facility	Private - Kawailoa	Carcass	F	yes	yes	OL894475				yes
O26	2014	Oahu	Kawailoa Wind Facility	Private - Kawailoa	Carcass	M	yes	yes	OL894476				yes
O27	2014	Oahu	Kawailoa Wind Facility	Private - Kawailoa	Carcass	M	no	yes	OL894477				yes
O28	2014	Oahu	Kawailoa Wind Facility	Private - Kawailoa	Carcass	F	yes	yes	OL894478				yes
M32	2014	Maui	Maalea Electrical Power Plant	Private - Kihei	Carcass	F	no	yes	OL894396			185966	yes
M33	2014	Maui	Auwahi Wind Facility	Private - Auwahi	Carcass	F	yes	yes	OL894397			185995	yes
M34	2014	Maui	Auwahi Wind Facility	Private - Auwahi	Carcass	F	yes	yes	OL894398			185994	yes
M35	2014	Maui	Auwahi Wind Facility	Private - Auwahi	Carcass	M	yes	yes	OL894399			185993	yes
H18	2015	Hawaii	Flume Road	State—Upper Waiakea Forest Reserve, Timber Management Area	Capture	M	no	yes	OL894254				yes	2015HHB002
H19	2015	Hawaii	Flume Road	State—Upper Waiakea Forest Reserve, Timber Management Area	Capture	F	yes	yes	OL894256				yes	2015HHB001
H20	2015	Hawaii	Flume Road	State—Upper Waiakea Forest Reserve, Timber Management Area	Capture	M	no	yes	OL894259				yes	2015HHB004
H21	2015	Hawaii	Flume Road	State—Upper Waiakea Forest Reserve, Timber Management Area	Capture	M	no	yes	OL894261				yes	2015HHB003
H22	2015	Hawaii	Flume Road	State—Upper Waiakea Forest Reserve, Timber Management Area	Capture	F	no	yes	OL894265				yes	2015HHB005
O29	2015	Oahu	Kawailoa Wind Facility	Private - Kawailoa	Carcass	M	yes	yes	OL894479				yes
O30	2015	Oahu	Kawailoa Wind Facility	Private - Kawailoa	Carcass	M	yes	yes	OL894480				yes
O31	2015	Oahu	Kawailoa Wind Facility	Private - Kawailoa	Carcass	M	yes	yes	OL894481				yes
O32	2015	Oahu	Kawailoa Wind Facility	Private - Kawailoa	Carcass	M	yes	yes	OL894482				yes
O43	2015	Oahu	Kawailoa Wind Facility	Private - Kawailoa	Carcass	M	yes	yes	OL894488				yes
O34	2015	Oahu	Kawailoa Wind Facility	Private - Kawailoa	Carcass	F	yes	yes	OL894483				yes
O40	2015	Oahu	Kawailoa Wind Facility	Private - Kawailoa	Carcass	M	no	yes	OL894487				yes
M36	2015	Maui	Auwahi Wind Facility	Private - Auwahi	Carcass	M	yes	yes	OL894400				yes
M37	2015	Maui	Sheraton Hotel	Private - Lahaina	Carcass	M	yes	no					yes
M38	2015	Maui	Auwahi Wind Facility	Private - Auwahi	Carcass	M	yes	no					yes
K6	2015	Kauai	Kilauea	Private - Kilauea	Carcass	F	no	yes	OL894373				yes
H36a	2015	Hawaii	Holualoa	Private - Holualoa	Carcass	M	no	yes	OL894295			186117	yes
H1X	2016	Hawaii	Kapaau	Private - Kapaau	Carcass	M	no	yes	OL894258				yes
H24	2016	Hawaii	Waimea	Private - Waimea	Carcass	F	no	yes	OL894282				yes
M39	2016	Maui	Auwahi Wind Facility	Private - Auwahi	Carcass	M	yes	yes	OL894401				yes
M40	2016	Maui	Auwahi Wind Facility	Private - Auwahi	Carcass	F	yes	yes	OL894402				yes
M41	2016	Maui	Auwahi Wind Facility	Private - Auwahi	Carcass	F	yes	yes	OL894403				yes
M42	2016	Maui	Auwahi Wind Facility	Private - Auwahi	Carcass	F	yes	yes	OL894404				yes
M43	2016	Maui	Auwahi Wind Facility	Private - Auwahi	Carcass	M	yes	yes	OL894405				yes
M44	2016	Maui	Auwahi Wind Facility	Private - Auwahi	Carcass	M	yes	yes	OL894406				yes
O36	2016	Oahu	Kawailoa Wind Facility	Private - Kawailoa	Carcass	M	yes	yes	OL894484				yes
O37	2016	Oahu	Kawailoa Wind Facility	Private - Kawailoa	Carcass	F	yes	yes	OL894485				yes
O38	2016	Oahu	Kawailoa Wind Facility	Private - Kawailoa	Carcass	F	yes	yes	OL894486				yes
M45	2016	Maui	Auwahi Wind Facility	Private - Auwahi	Carcass	M	yes	yes	OL894407				yes
M46	2016	Maui	Kaheawa Wind Facility	Private - Kaheawa	Carcass	M	yes	yes	OL894408				yes
M47	2016	Maui	Puu Makua Restoration Area	Private—Ulupalakua	Capture	M	no	yes	OL894409				yes	2016HHB001
M48	2016	Maui	Puu Makua Restoration Area	Private—Ulupalakua	Capture	M	no	yes	OL894410				yes	2016HHB002
M49	2016	Maui	Puu Makua Restoration Area	Private—Ulupalakua	Capture	M	no	yes	OL894411				yes	2016HHB003
M50	2016	Maui	Kula	Private - Kula	Carcass	F	yes	yes	OL894412				yes
M51	2016	Maui	Kaheawa Wind Facility	Private - Kaheawa	Carcass	F	yes	yes	OL894413				yes
H25	2017	Hawaii	Amauulu Road	Private - Hilo	Carcass	F	no	no					yes
H26	2017	Hawaii	Kaumana	Private - Hilo	Carcass	F	no	yes	OL894283				no
M100	2017	Maui	Kaheawa Wind Facility	Private - Kaheawa	Carcass	F	yes	yes	OL894377				yes
M50B	2017	Maui	Puu Makua Restoration Area	Private—Ulupalakua	Capture	M	no	no					yes	2017HHB002
M51B	2017	Maui	Puu Makua Restoration Area	Private—Ulupalakua	Capture	M	no	no					yes	2017HHB003
M52	2017	Maui	Puu Makua Restoration Area	Private—Ulupalakua	Capture	F	no	yes	OL894414				yes	2017HHB004
M53	2017	Maui	Puu Makua Restoration Area	Private—Ulupalakua	Capture	M	no	yes	OL894415				yes	2017HHB005
M54	2017	Maui	Puu Makua Restoration Area	Private—Ulupalakua	Capture	F	no	yes	OL894416				yes	2017HHB006
M55	2017	Maui	Puu Makua Restoration Area	Private—Ulupalakua	Capture	M	no	yes	OL894417				yes	2017HHB007
M56	2017	Maui	Puu Makua Restoration Area	Private—Ulupalakua	Capture	M	no	yes	OL894418				yes	2017HHB008
M57	2017	Maui	Puu Makua Restoration Area	Private—Ulupalakua	Capture	F	no	yes	OL894419				yes	2017HHB009
M58	2017	Maui	Kahikinui Forest Reserve	State - Kahikinui Forest Reserve	Carcass	M	no	yes	OL894420				yes
M59	2017	Maui	Auwahi Wind Facility	Private - Auwahi	Carcass	F	yes	yes	OL894421				yes
M60	2017	Maui	Auwahi Wind Facility	Private - Auwahi	Carcass	M	yes	yes	OL894422				yes
M61	2017	Maui	Auwahi Wind Facility	Private - Auwahi	Carcass	F	yes	yes	OL894423				yes
O44	2017	Oahu	Kawailoa Wind Facility	Private - Kawailoa	Carcass	F	yes	no					yes
O45	2017	Oahu	Kawailoa Wind Facility	Private - Kawailoa	Carcass	F	yes	yes	OL894489				yes
O46	2017	Oahu	Kawailoa Wind Facility	Private - Kawailoa	Carcass	M	yes	yes	OL894490				yes
O47	2017	Oahu	Kawailoa Wind Facility	Private - Kawailoa	Carcass	F	yes	yes	OL894491				yes
M62	2017	Maui	Auwahi Wind Facility	Private - Auwahi	Carcass	M	yes	no					yes
M63	2017	Maui	Auwahi Wind Facility	Private - Auwahi	Carcass	M	yes	yes	OL894424				yes
M64	2017	Maui	Native Nursery	Private - Kula	Capture	F	no	yes	OL894425				yes
M65	2017	Maui	Native Nursery	Private - Kula	Capture	M	no	yes	OL894426				yes
M66	2017	Maui	Maui Forest Bird Recovery Office	Private - Kula	Capture	F	no	yes	OL894427				yes
M67	2017	Maui	Maui Forest Bird Recovery Office	Private - Kula	Capture	M	no	yes	OL894428				yes
M68	2017	Maui	Native Nursery	Private - Kula	Capture	M	no	yes	OL894429				yes
M72	2017	Maui	Kula Firehouse	Private - Kula	Capture	F	no	yes	OL894433				yes
M73	2017	Maui	Maui Forest Bird Recovery Office	Private - Kula	Capture	M	no	yes	OL894434				yes
M78	2017	Maui	Kula 200 mile marker	Private - Kula	Carcass	M	no	yes	OL894438				yes
H27	2017	Hawaii	Panewa	Private - Hilo	Capture	F	no	yes	OL894284				yes
H28	2018	Hawaii	Flume Road	State—Upper Waiakea Forest Reserve, Timber Management Area	Capture	F	no	yes	OL894285				yes	2018HHB001
H29	2018	Hawaii	Island Princess	Private—Keaau	Capture	F	no	no					yes	2018HHB002
H2X	2018	Hawaii	Honaunau	Federal - Puuhonua O Honaunau National Historical Park	Carcass	F	no	yes	OL894286				yes
H30	2018	Hawaii	Island Princess	Private—Keaau	Capture	M	no	yes	OL894288				yes	2018HHB003
H31	2018	Hawaii	Hilo	Private - Hilo	Carcass	M	no	yes	OL894289				yes
H32	2018	Hawaii	Island Princess	Private—Keaau	Capture	M	no	yes	OL894291				yes	2018HHB004
H33	2018	Hawaii	J7 Ranch	State—Hilo Forest Reserve, Watershed Reserve Section	Capture	M	no	yes	OL894292				yes	2018HHB005
H34	2018	Hawaii	Amauulu Road	Private - Hilo	Capture	M	no	yes	OL894293				yes	2018HHB007
H35	2018	Hawaii	Amauulu Road	Private - Hilo	Capture	F	no	yes	OL894294				yes	2018HHB008
H36B	2018	Hawaii	Amauulu Road	Private - Hilo	Capture	M	no	yes	OL894296				yes	2018HHB009
H37	2018	Hawaii	Flume Road	State—Upper Waiakea Forest Reserve, Timber Management Area	Capture	M	no	yes	OL894297				yes	2018HHB010
M101	2018	Maui	Kaheawa Wind Facility	Private - Kaheawa	Carcass	F	yes	yes	OL894378				yes
M102	2018	Maui	Kaheawa Wind Facility	Private - Kaheawa	Carcass	F	yes	yes	OL894379				yes
M69	2018	Maui	Auwahi Wind Facility	Private - Auwahi	Carcass	M	yes	yes	OL894430				yes
M70	2018	Maui	Auwahi Wind Facility	Private - Auwahi	Carcass	M	yes	yes	OL894431				yes
M71	2018	Maui	Auwahi Wind Facility	Private - Auwahi	Carcass	F	yes	yes	OL894432				yes
M74	2018	Maui	12 mile pool	Federal - Haleakala National Park	Capture	M	no	yes	OL894435				yes
M75	2018	Maui	Resource Management Office	Federal - Haleakala National Park	Capture	M	no	yes	OL894436				yes
M76	2018	Maui	Maui Forest Bird Recovery Office	Private - Kula	Capture	M	no	yes	OL894437				yes
O50	2018	Oahu	Kawailoa Wind Facility	Private - Kawailoa	Carcass	M	yes	yes	OL894493				yes
O51	2018	Oahu	Kawailoa Wind Facility	Private - Kawailoa	Carcass	F	yes	yes	OL894494				yes
O52	2018	Oahu	Kawailoa Wind Facility	Private - Kawailoa	Carcass	F	yes	yes	OL894495				yes
O53	2018	Oahu	Kawailoa Wind Facility	Private - Kawailoa	Carcass	F	yes	yes	OL894496				yes
O54	2018	Oahu	Kawailoa Wind Facility	Private - Kawailoa	Carcass	F	yes	yes	OL894497				yes
O55	2018	Oahu	Kawailoa Wind Facility	Private - Kawailoa	Carcass	M	yes	yes	OL894498				yes
H38	2018	Hawaii	J7 Ranch	State—Hilo Forest Reserve, Watershed Reserve Section	Capture	M	no	yes	OL894298				yes	2018HHB011
H39	2018	Hawaii	Tree Planting Road	State—Hilo Forest Reserve, Watershed Reserve Section	Capture	M	no	yes	OL894299				yes	2018HHB012
H3X	2018	Hawaii	Honaunau	Federal - Puuhonua O Honaunau National Historical Park	Carcass	F	no	yes	OL894300				yes
H40	2018	Hawaii	Tree Planting Road	State—Hilo Forest Reserve, Watershed Reserve Section	Capture	M	no	yes	OL894301				yes	2018HHB013
H41	2018	Hawaii	Powerline Road	State—Upper Waiakea Forest Reserve	Capture	M	no	yes	OL894302				yes	2018HHB014
H42	2018	Hawaii	Powerline Road	State—Upper Waiakea Forest Reserve	Capture	M	no	yes	OL894303				yes	2018HHB015
M79	2018	Maui	Maui Forest Bird Recovery Office	Private - Kula	Capture	M	no	yes	OL894439				yes
M80	2018	Maui	Maui Forest Bird Recovery Office	Private - Kula	Capture	F	no	yes	OL894440				yes
M81	2018	Maui	Maui Forest Bird Recovery Office	Private - Kula	Capture	M	no	yes	OL894441				yes
M82	2018	Maui	Maui Forest Bird Recovery Office	Private - Kula	Capture	M	no	yes	OL894442				yes
M83	2018	Maui	Maui Forest Bird Recovery Office	Private - Kula	Capture	M	no	yes	OL894443				yes
M84	2018	Maui	Maui Forest Bird Recovery Office	Private - Kula	Capture	F	no	yes	OL894444				yes
M85	2018	Maui	Maui Forest Bird Recovery Office	Private - Kula	Capture	F	no	yes	OL894445				yes
M86	2018	Maui	Maui Forest Bird Recovery Office	Private - Kula	Capture	F	no	yes	OL894446				yes
M87	2018	Maui	Maui Forest Bird Recovery Office	Private - Kula	Capture	M	no	yes	OL894447				yes
M88	2018	Maui	Resource Management Office	Federal - Haleakala National Park	Capture	M	no	yes	OL894448				yes
K10	2019	Kauai	Haeleele Road	State—Puu Ka Pele Forest Reserve	Capture	F	no	yes	OL894363				yes	2019HHB053
H43	2019	Hawaii	Tree Planting Road	State—Hilo Forest Reserve, Watershed Reserve Section	Capture	M	no	yes	OL894304				yes	2019HHB001
H44	2019	Hawaii	Tree Planting Road	State—Hilo Forest Reserve, Watershed Reserve Section	Capture	F	no	yes	OL894305				yes	2019HHB002
H45	2019	Hawaii	Olaa Flume Spring	County—Department of Water Supply	Capture	M	no	yes	OL894306				yes	2019HHB003
H46	2019	Hawaii	Amauulu Road	Private—Hilo	Capture	M	no	yes	OL894307				yes	2019HHB004
H47	2019	Hawaii	Puu Makaala	State—Puu Makaala Natural Area Reserve	Capture	F	no	yes	OL894308				yes	2019HHB005
H48	2019	Hawaii	Puu Makaala	State—Puu Makaala Natural Area Reserve	Capture	M	no	yes	OL894309				yes	2019HHB006
H49	2019	Hawaii	Puu Makaala	State—Puu Makaala Natural Area Reserve	Capture	M	no	yes	OL894310				yes	2019HHB007
H50	2019	Hawaii	Laupahoehoe	State—Laupahoehoe Natural Area Reserve	Capture	M	no	yes	OL894311				yes	2019HHB008
H51	2019	Hawaii	Laupahoehoe	State—Laupahoehoe Natural Area Reserve	Capture	M	no	yes	OL894314				yes	2019HHB009
H52	2019	Hawaii	Laupahoehoe	State—Laupahoehoe Natural Area Reserve	Capture	M	no	yes	OL894316				yes	2019HHB010
H53	2019	Hawaii	Road C	State—Upper Waiakea Forest Reserve, Timber Management Area	Capture	M	no	yes	OL894317				yes	2019HHB012
H54	2019	Hawaii	Tree Planting Road	State—Hilo Forest Reserve, Watershed Reserve Section	Capture	M	no	yes	OL894318				yes	2019HHB013
H55	2019	Hawaii	Tree Planting Road	State—Hilo Forest Reserve, Watershed Reserve Section	Capture	M	no	yes	OL894319				yes	2019HHB014
H56	2019	Hawaii	Tree Planting Road	State—Hilo Forest Reserve, Watershed Reserve Section	Capture	M	no	yes	OL894320				yes	2019HHB015
H57	2019	Hawaii	Powerline Road	State—Upper Waiakea Forest Reserve	Capture	M	no	yes	OL894321				yes	2019HHB016
H58	2019	Hawaii	Amauulu Road	Private—Hilo	Capture	M	no	yes	OL894322				yes	2019HHB017
H59	2019	Hawaii	DOFAW Arboretum	State—Division of Forestry and Wildlife Hilo Arboretum	Capture	M	no	yes	OL894323				yes	2019HHB018
H60	2019	Hawaii	DOFAW Arboretum	State—Division of Forestry and Wildlife Hilo Arboretum	Capture	M	no	yes	OL894324				yes	2019HHB019
H61	2019	Hawaii	Amauulu Road	Private—Hilo	Capture	M	no	yes	OL894325				yes	2019HHB020
H62	2019	Hawaii	Flume Road	State—Upper Waiakea Forest Reserve, Timber Management Area	Capture	M	no	yes	OL894328				yes	2019HHB021
K11	2019	Kauai	Kauhau Road	State—Puu Ka Pele Forest Reserve	Capture	M	no	yes	OL894364				yes	2019HHB054
H63	2019	Hawaii	Flume Road	State—Upper Waiakea Forest Reserve, Timber Management Area	Capture	M	no	yes	OL894329				yes	2019HHB023
H64	2019	Hawaii	Flume Road	State—Upper Waiakea Forest Reserve, Timber Management Area	Capture	M	no	yes	OL894330				yes	2019HHB024
H65	2019	Hawaii	Flume Road	State—Upper Waiakea Forest Reserve, Timber Management Area	Capture	M	no	yes	OL894331				yes	2019HHB025
H66	2019	Hawaii	Laupahoehoe	State—Laupahoehoe Natural Area Reserve	Capture	F	no	yes	OL894332				yes	2019HHB026
H67	2019	Hawaii	Laupahoehoe	State—Laupahoehoe Natural Area Reserve	Capture	F	no	yes	OL894333				yes	2019HHB027
H68	2019	Hawaii	Laupahoehoe	State—Laupahoehoe Natural Area Reserve	Capture	F	no	yes	OL894334				yes	2019HHB029
H69	2019	Hawaii	Laupahoehoe	State—Laupahoehoe Natural Area Reserve	Capture	F	no	yes	OL894335				yes	2019HHB030
H70	2019	Hawaii	Laupahoehoe	State—Laupahoehoe Natural Area Reserve	Capture	M	no	yes	OL894337				yes	2019HHB032
H71	2019	Hawaii	Laupahoehoe	State—Laupahoehoe Natural Area Reserve	Capture	F	no	yes	OL894338				yes	2019HHB033
H72	2019	Hawaii	Laupahoehoe	State—Laupahoehoe Natural Area Reserve	Capture	F	no	yes	OL894340				yes	2019HHB034
H73	2019	Hawaii	Laupahoehoe	State—Laupahoehoe Natural Area Reserve	Capture	F	no	yes	OL894341				yes	2019HHB035
H74	2019	Hawaii	Laupahoehoe	State—Laupahoehoe Natural Area Reserve	Capture	M	no	yes	OL894342				yes	2019HHB037
H75	2019	Hawaii	J7 Ranch	State—Hilo Forest Reserve, Watershed Reserve Section	Capture	M	no	yes	OL894343				yes	2019HHB038
H76	2019	Hawaii	J7 Ranch	State—Hilo Forest Reserve, Watershed Reserve Section	Capture	M	no	yes	OL894344				yes	2019HHB039
H77	2019	Hawaii	J7 Ranch	State—Hilo Forest Reserve, Watershed Reserve Section	Capture	F	no	yes	OL894345				yes	2019HHB040
H78	2019	Hawaii	J7 Ranch	State—Hilo Forest Reserve, Watershed Reserve Section	Capture	F	no	yes	OL894346				yes	2019HHB041
H79	2019	Hawaii	Tree Planting Road	State—Hilo Forest Reserve, Watershed Reserve Section	Capture	M	no	yes	OL894347				yes	2019HHB042
H80	2019	Hawaii	Tree Planting Road	State—Hilo Forest Reserve, Watershed Reserve Section	Capture	M	no	yes	OL894348				yes	2019HHB043
H81	2019	Hawaii	Tree Planting Road	State—Hilo Forest Reserve, Watershed Reserve Section	Capture	M	no	yes	OL894349				yes	2019HHB044
H82	2019	Hawaii	Tree Planting Road	State—Hilo Forest Reserve, Watershed Reserve Section	Capture	F	no	yes	OL894350				yes	2019HHB045
H83	2019	Hawaii	Hilo	Private - Hilo	Capture	F	no	yes	OL894351				yes
H84	2019	Hawaii	Island Princess	Private—Keaau	Capture	M	no	yes	OL894352				yes	2019HHB046
H85	2019	Hawaii	Island Princess	Private—Keaau	Capture	F	no	yes	OL894353				yes	2019HHB047
H86	2019	Hawaii	Island Princess	Private—Keaau	Capture	F	no	yes	OL894354				yes	2019HHB048
H87	2019	Hawaii	Amauulu Road	Private—Hilo	Capture	F	no	yes	OL894355				yes	2019HHB049
H88	2019	Hawaii	Puu Makaala	State—Puu Makaala Natural Area Reserve	Capture	M	no	yes	OL894356				yes	2019HHB070
H89	2019	Hawaii	Flume Road	State—Upper Waiakea Forest Reserve, Timber Management Area	Capture	M	no	yes	OL894357				yes	2019HHB071
H90	2019	Hawaii	Flume Road	State—Upper Waiakea Forest Reserve, Timber Management Area	Capture	M	no	yes	OL894358				yes	2019HHB072
H91	2019	Hawaii	Laupahoehoe	State—Laupahoehoe Natural Area Reserve	Capture	M	no	yes	OL894359				yes	2019HHB073
H92	2019	Hawaii	Laupahoehoe	State—Laupahoehoe Natural Area Reserve	Capture	M	no	yes	OL894360				yes	2019HHB074
H93	2019	Hawaii	Laupahoehoe	State—Laupahoehoe Natural Area Reserve	Capture	M	no	yes	OL894361				yes	2019HHB075
H94	2019	Hawaii	Powerline Road	State—Upper Waiakea Forest Reserve	Capture	M	no	yes	OL894362				yes	2019HHB076
K12	2019	Kauai	Kauhau Road	State—Puu Ka Pele Forest Reserve	Capture	M	no	yes	OL894365				yes	2019HHB055
K13	2019	Kauai	Kauhau Road	State—Puu Ka Pele Forest Reserve	Capture	F	no	yes	OL894366				yes	2019HHB056
K14	2019	Kauai	Haeleele Road	State—Puu Ka Pele Forest Reserve	Capture	M	no	yes	OL894367				yes	2019HHB057
K15	2019	Kauai	Haeleele Road	State—Puu Ka Pele Forest Reserve	Capture	M	no	yes	OL894368				yes	2019HHB058
K16	2019	Kauai	Haeleele Road	State—Puu Ka Pele Forest Reserve	Capture	F	no	yes	OL894369				yes	2019HHB059
K17	2019	Kauai	Haeleele Road	State—Puu Ka Pele Forest Reserve	Capture	F	no	yes	OL894370				yes	2019HHB060
K18	2019	Kauai	Haeleele Road	State—Puu Ka Pele Forest Reserve	Capture	F	no	yes	OL894371				yes	2019HHB061
K19	2019	Kauai	Haeleele Road	State—Puu Ka Pele Forest Reserve	Capture	M	no	yes	OL894372				yes	2019HHB062
K7	2019	Kauai	Hanalei National Wildlife Refuge	Federal—Hanalei National Wildlife Refuge	Capture	F	no	yes	OL894374				yes	2019HHB050
K8	2019	Kauai	Hanalei National Wildlife Refuge	Federal—Hanalei National Wildlife Refuge	Capture	F	no	yes	OL894375				yes	2019HHB051
K9	2019	Kauai	Hanalei National Wildlife Refuge	Federal—Hanalei National Wildlife Refuge	Capture	M	no	yes	OL894376				yes	2019HHB052
M91	2019	Maui	Auwahi Wind Facility	Private - Auwahi	Carcass	F	yes	yes	OL894451				no
M89	2019	Maui	Auwahi Wind Facility	Private - Auwahi	Carcass	F	yes	yes	OL894449				yes
M90	2019	Maui	Auwahi Wind Facility	Private - Auwahi	Carcass	M	yes	yes	OL894450				yes
M92	2019	Maui	Auwahi Wind Facility	Private - Auwahi	Carcass	M	yes	yes	OL894452				yes
M93	2019	Maui	Auwahi Wind Facility	Private - Auwahi	Carcass	M	yes	yes	OL894453				yes
M94	2019	Maui	Auwahi Wind Facility	Private - Auwahi	Carcass	F	yes	yes	OL894454				yes
M95	2019	Maui	Auwahi Wind Facility	Private - Auwahi	Carcass	F	yes	yes	OL894455				yes
M96	2019	Maui	Auwahi Wind Facility	Private - Auwahi	Carcass	F	yes	yes	OL894456				yes
M97	2019	Maui	Auwahi Wind Facility	Private - Auwahi	Carcass	F	yes	yes	OL894457				yes
M98	2019	Maui	Auwahi Wind Facility	Private - Auwahi	Capture	M	no	yes	OL894458				yes
M99	2019	Maui	Auwahi Wind Facility	Private - Auwahi	Carcass	F	yes	yes	OL894459				yes
H118	2020	Hawaii	Liliuokalani Gardens	County - Hilo	Carcass	F	no	no					yes
O56	2020	Oahu	Kahuku Wind Facility	Private - Kahuku	Carcass	M	yes	no					yes
M103	2020	Maui	Auwahi Wind Facility	Private - Auwahi	Carcass	M	yes	no					yes
M104	2020	Maui	Auwahi Wind Facility	Private - Auwahi	Carcass	M	yes	no					yes

## Sheet: IBD populations
IBD Pop	Bat
1	H109
1	H1101
1	H1409
1	H1509
1	H25
1	H34
1	H35
1	H36b
1	H46
1	H58
1	H61
1	H87
2	H59
2	H60
3	H12
3	H118
3	H31
3	H83
4	H3
5	H2210,
5	H33,
5	H38,
5	H75,
5	H76,
5	H77,
5	H78,
6	H45
7	H9
8	H36
9	H17
9	H2X
9	H3X
10	H1511
11	H18,
11	H19,
11	H21,
11	H20,
11	H22,
11	H28,
11	H62,
11	H37,
11	H63,
11	H64,
11	H65,
11	H89,
11	H90,
12	H50112,
12	H50113,
12	H111,
12	H210,
12	H211,
12	H29,
12	H30,
12	H32,
12	H610,
12	H84,
12	H85,
12	H86,
13	H27
14	H53
15	H710
16	H109
17	H911,
17	H1910,
17	H1710,
17	H1610,
17	H1810,
17	H2211,
17	H2010,
17	H2110,
17	H2212,
17	H2213,
17	H2214,
17	H2215,
17	H2217,
17	H2216,
17	H2222,
17	H2219,
17	H2220,
17	H2221,
17	H2226,
17	H2223,
17	H2224,
17	H2225,
17	H711,
17	H311,
17	H511,
17	H611,
17	H2218,
17	H50,
17	H51,
17	H52,
17	H67,
17	H66,
17	H74,
17	H68,
17	H69,
17	H70,
17	H71,
17	H93,
17	H72,
17	H73,
17	H91,
17	H92,
18	H6,
19	H1X,
20	H16,
20	H24,
21	H7,
22	H15,
23	H8,
24	HMU1,
25	H42,
25	H41,
25	H57,
25	H94,
26	H47,
26	H48,
26	H88,
26	H49,
27	H40,
27	H39,
27	H43,
27	H44,
27	H55,
27	H54,
27	H79,
27	H56,
27	H80,
27	H81,
27	H82,
28	M74,
29	M75,
29	M88,
30	M15,
31	M58,
32	M21,
32	M33,
32	M34,
32	M36,
32	M35,
32	M39,
32	M40,
32	M41,
32	M42,
32	M43,
32	M44,
32	M46,
32	M45,
32	M47,
32	M48,
32	M49,
32	M50,
32	M51,
32	M59,
32	M60,
32	M61,
32	M63,
32	M69,
32	M70,
32	M71,
32	M89,
32	M90,
32	M92,
32	M93,
32	M94,
32	M95,
32	M96,
32	M97,
32	M98,
32	M99,
32	M62,
32	M103,
32	M104,
32	M38,
33	M8,
34	M12,
35	M72,
35	M78,
36	M23																			0
37	M66,
37	M67,
37	M73,
37	M76,
37	M79,
37	M80,
37	M81,
37	M82,
37	M83,
37	M84,
37	M85,
37	M86,
37	M87,
38	M64,
38	M65,
38	M68,
39	M5,
39	M30,
40	M4,
40	M7,
41	M10,
41	M16,
41	M18,
41	M20,
41	M13,
41	M17,
41	M27,
41	M28,
41	M29,
41	M101,
41	M102,
41	M100,
42	M3,
42	M19,
42	M31,
42	M22,
42	M25,
42	M14,
43	M32,
45	M1,
47	M50B,
47	M52,
47	M54,
47	M56,
47	M57,
48	M9,
49	O2,
49	O3,
49	O4,
49	O21,
49	O56,
50	O5,
50	O11,
50	O12,
50	O13,
50	O14,
50	O15,
50	O16,
50	O17,
50	O18,
50	O6,
50	O7,
50	O8,
50	O19,
50	O20,
50	O22,
50	O23,
50	O24,
50	O26,
50	O28,
50	O25,
50	O27,
50	O29,
50	O32,
50	O30,
50	O31,
50	O33,
50	O34,
50	O40,
50	O36,
50	O37,
50	O38,
50	O44,
50	O45,
50	O46,
50	O47,
50	O50,
50	O51,
50	O52,
50	O53,
50	O54,
50	O55,
51	O9,
52	O10,
53	O1,
54	K7,
54	K8,
54	K9,
55	K1,
56	K2,
57	K6,
58	K10,
58	K14,
58	K15,
58	K16,
58	K17,
58	K18,
58	K19,
59	K12,
59	K13,
59	K11,

## Sheet: IBD testing x and y coordinates
pop	x	y
1	19.7276	155.096
2	19.706	155.073
3	19.7003	155.069
4	19.4438	155.889
5	19.7063	155.161
6	19.6969	155.184
7	19.4438	155.889
8	19.6192	155.929
9	19.4199	155.912
10	19.6874	156.032
11	19.6055	155.155
12	19.6116	155.085
13	19.6611	155.066
14	19.6105	155.1
15	19.8857	155.323
16	19.8336	155.107
17	19.9537	155.278
18	20.2387	155.834
19	20.2336	155.803
20	20.0231	155.672
21	19.5249	155.342
22	19.0591	155.62
23	19.1853	155.797
24	19.5614	155.51
25	19.6268	155.361
26	19.5269	155.298
27	19.674	155.287
28	20.7517	156.233
29	20.7686	156.244
30	20.6694	156.234
31	20.6923	156.236
32	20.5955	156.318
33	20.9064	156.284
34	20.7058	156.358
35	20.791	156.327
36	20.8569	156.313
37	20.8071	156.281
38	20.7575	156.345
39	20.8237	156.295
40	20.8396	156.342
41	20.8169	156.552
42	20.7705	156.456
43	20.7959	156.506
44	20.6875	156.439
45	20.645	156.069
46	20.8786	156.682
47	20.6668	156.343
48	20.8761	156.188
49	21.6803	157.95
50	21.6144	158.053
51	21.6046	158.098
52	21.6365	158.054
53	21.4716	157.996
54	22.2039	159.473
55	22.0576	159.662
56	22.2051	159.498
57	22.2119	159.412
58	22.0876	159.694
59	22.1088	159.696

## Sheet: SexbiasedDispTestGroups
Island	Pop	Bat
Kauai	1	K7
Kauai	1	K8
Kauai	1	K9
Kauai	1	K6
Kauai	1	K2
Kauai	2	K1
Kauai	2	K10
Kauai	2	K11
Kauai	2	K12
Kauai	2	K13
Kauai	2	K14
Kauai	2	K15
Kauai	2	K16
Kauai	2	K17
Kauai	2	K18
Kauai	2	K19
Hawaii	1	H109
Hawaii	1	H1101
Hawaii	1	H1409
Hawaii	1	H1509
Hawaii	1	H25
Hawaii	1	H34
Hawaii	1	H35
Hawaii	1	H36b
Hawaii	1	H46
Hawaii	1	H58
Hawaii	1	H61
Hawaii	1	H87
Hawaii	1	H59
Hawaii	1	H60
Hawaii	1	H12
Hawaii	1	H118
Hawaii	1	H31
Hawaii	1	H83
Hawaii	1	H3
Hawaii	1	H2210
Hawaii	1	H33
Hawaii	1	H38
Hawaii	1	H75
Hawaii	1	H76
Hawaii	1	H77
Hawaii	1	H78
Hawaii	1	HMU1
Hawaii	1	H42
Hawaii	1	H41
Hawaii	1	H57
Hawaii	1	H94
Hawaii	1	H47
Hawaii	1	H48
Hawaii	1	H88
Hawaii	1	H49
Hawaii	1	H40
Hawaii	1	H39
Hawaii	1	H43
Hawaii	1	H44
Hawaii	1	H55
Hawaii	1	H54
Hawaii	1	H79
Hawaii	1	H56
Hawaii	1	H80
Hawaii	1	H81
Hawaii	1	H82
Hawaii	1	H18
Hawaii	1	H19
Hawaii	1	H21
Hawaii	1	H20
Hawaii	1	H22
Hawaii	1	H28
Hawaii	1	H62
Hawaii	1	H37
Hawaii	1	H63
Hawaii	1	H64
Hawaii	1	H65
Hawaii	1	H89
Hawaii	1	H90
Hawaii	1	H53
Hawaii	1	H50112
Hawaii	1	H50113
Hawaii	1	H111
Hawaii	1	H210
Hawaii	1	H211
Hawaii	1	H29
Hawaii	1	H30
Hawaii	1	H32
Hawaii	1	H610
Hawaii	1	H84
Hawaii	1	H85
Hawaii	1	H86
Hawaii	1	H45
Hawaii	1	H27
Hawaii	2	H9
Hawaii	2	H36
Hawaii	2	H17
Hawaii	2	H2X
Hawaii	2	H3X
Hawaii	2	H1511
Hawaii	3	H6
Hawaii	3	H1X
Hawaii	3	H16
Hawaii	3	H24
Hawaii	3	H7
Hawaii	3	H15
Hawaii	3	H8
Hawaii	4	H710
Hawaii	4	H911
Hawaii	4	H1910
Hawaii	4	H1710
Hawaii	4	H1610
Hawaii	4	H1810
Hawaii	4	H2211
Hawaii	4	H2010
Hawaii	4	H2110
Hawaii	4	H2212
Hawaii	4	H2213
Hawaii	4	H2214
Hawaii	4	H2215
Hawaii	4	H2217
Hawaii	4	H2216
Hawaii	4	H2222
Hawaii	4	H2219
Hawaii	4	H2220
Hawaii	4	H2221
Hawaii	4	H2226
Hawaii	4	H2223
Hawaii	4	H2224
Hawaii	4	H2225
Hawaii	4	H711
Hawaii	4	H311
Hawaii	4	H511
Hawaii	4	H611
Hawaii	4	H2218
Hawaii	4	H50
Hawaii	4	H51
Hawaii	4	H52
Hawaii	4	H67
Hawaii	4	H66
Hawaii	4	H74
Hawaii	4	H68
Hawaii	4	H69
Hawaii	4	H70
Hawaii	4	H71
Hawaii	4	H93
Hawaii	4	H72
Hawaii	4	H73
Hawaii	4	H91
Hawaii	4	H92
Oahu	1	O2
Oahu	1	O3
Oahu	1	O4
Oahu	1	O21
Oahu	1	O56
Oahu	1	O9
Oahu	1	O1
Oahu	2	O5
Oahu	2	O11
Oahu	2	O12
Oahu	2	O13
Oahu	2	O14
Oahu	2	O15
Oahu	2	O16
Oahu	2	O17
Oahu	2	O18
Oahu	2	O6
Oahu	2	O7
Oahu	2	O8
Oahu	2	O19
Oahu	2	O20
Oahu	2	O22
Oahu	2	O23
Oahu	2	O24
Oahu	2	O26
Oahu	2	O28
Oahu	2	O25
Oahu	2	O27
Oahu	2	O29
Oahu	2	O32
Oahu	2	O30
Oahu	2	O31
Oahu	2	O33
Oahu	2	O34
Oahu	2	O40
Oahu	2	O36
Oahu	2	O37
Oahu	2	O38
Oahu	2	O44
Oahu	2	O45
Oahu	2	O46
Oahu	2	O47
Oahu	2	O50
Oahu	2	O51
Oahu	2	O52
Oahu	2	O53
Oahu	2	O54
Oahu	2	O55
Oahu	2	O10
Maui	1	M15
Maui	1	M58
Maui	1	M74
Maui	1	M75
Maui	1	M88
Maui	1	M21
Maui	1	M33
Maui	1	M34
Maui	1	M36
Maui	1	M35
Maui	1	M39
Maui	1	M40
Maui	1	M41
Maui	1	M42
Maui	1	M43
Maui	1	M44
Maui	1	M45
Maui	1	M47
Maui	1	M48
Maui	1	M49
Maui	1	M51
Maui	1	M59
Maui	1	M60
Maui	1	M61
Maui	1	M63
Maui	1	M69
Maui	1	M70
Maui	1	M71
Maui	1	M89
Maui	1	M90
Maui	1	M92
Maui	1	M93
Maui	1	M94
Maui	1	M95
Maui	1	M96
Maui	1	M97
Maui	1	M98
Maui	1	M99
Maui	1	M62
Maui	1	M103
Maui	1	M104
Maui	1	M38
Maui	1	M50B
Maui	1	M51B
Maui	1	M52
Maui	1	M53
Maui	1	M54
Maui	1	M55
Maui	1	M56
Maui	1	M57
Maui	1	M1
Maui	1	M8
Maui	1	M9
Maui	2	M5
Maui	2	M4
Maui	2	M7
Maui	2	M12
Maui	2	M30
Maui	2	M50
Maui	2	M64
Maui	2	M65
Maui	2	M68
Maui	2	M72
Maui	2	M78
Maui	2	M66
Maui	2	M67
Maui	2	M73
Maui	2	M76
Maui	2	M79
Maui	2	M80
Maui	2	M81
Maui	2	M82
Maui	2	M83
Maui	2	M84
Maui	2	M85
Maui	2	M86
Maui	2	M87
Maui	3	M10
Maui	3	M16
Maui	3	M18
Maui	3	M20
Maui	3	M13
Maui	3	M17
Maui	3	M27
Maui	3	M28
Maui	3	M29
Maui	3	M101
Maui	3	M102
Maui	3	M100
Maui	3	M46
Maui	3	M37
Maui	4	M2
Maui	4	M3
Maui	4	M24
Maui	4	M25
Maui	4	M19
Maui	4	M31
Maui	4	M14
Maui	4	M32
