# Supplementary material for: Genetic diversity, structure, and effective population size of an endangered, endemic hoary bat, ʻōpeʻapeʻa, across the Hawaiian Islands
Source: PeerJ journal article supplement (doi:10.7717/peerj.14365), 2023-01-25

Kaua`i

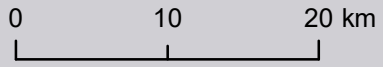

O`ahu

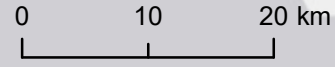

N

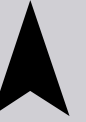

Maui

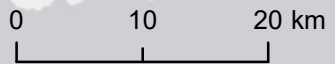

Hawai`i

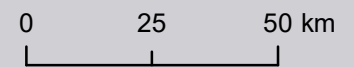

Supplement: Supplemental_Figure_2.pdf [file Supplemental_Figure_2.pdf]
