# Supplementary material for: Genetic diversity, structure, and effective population size of an endangered, endemic hoary bat, ʻōpeʻapeʻa, across the Hawaiian Islands
Source: PeerJ journal article supplement (doi:10.7717/peerj.14365), 2023-01-25
Supplement: Supplemental_Figure_4.pdf [file Supplemental_Figure_4.pdf]

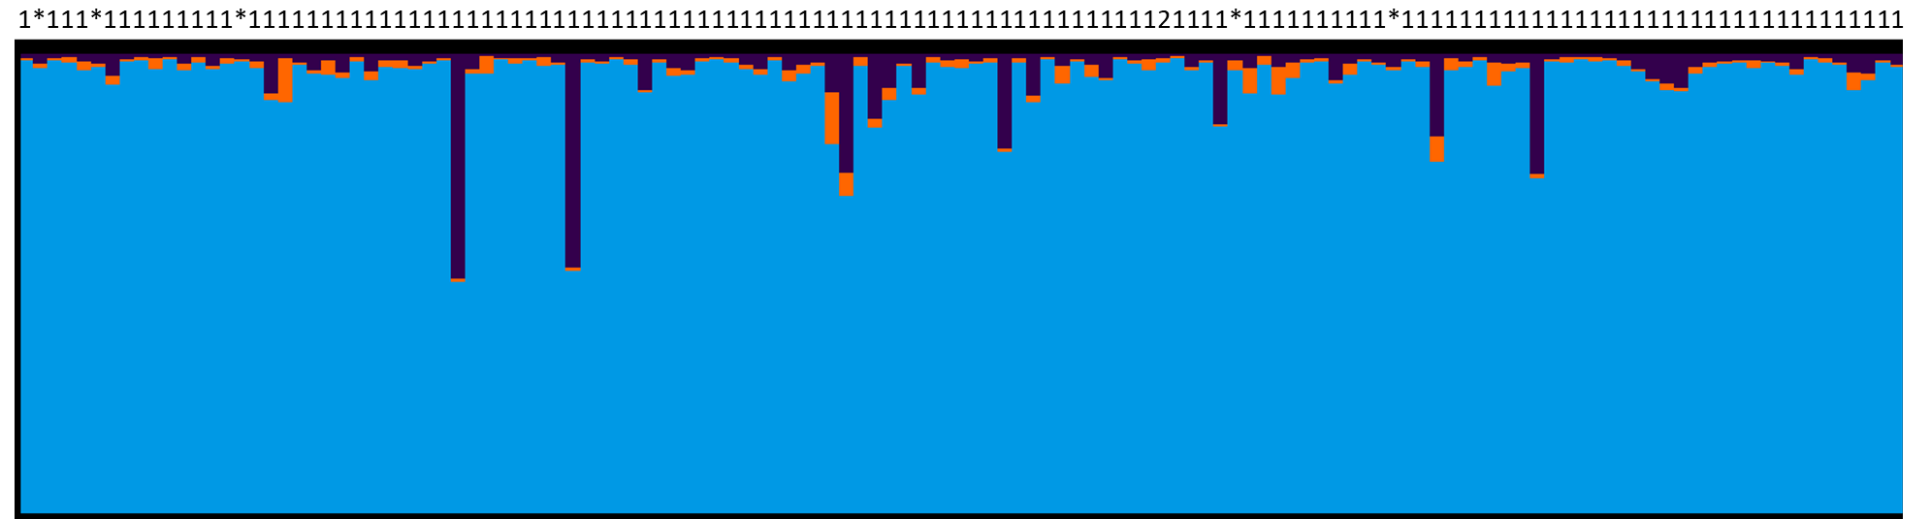

Hawai'i

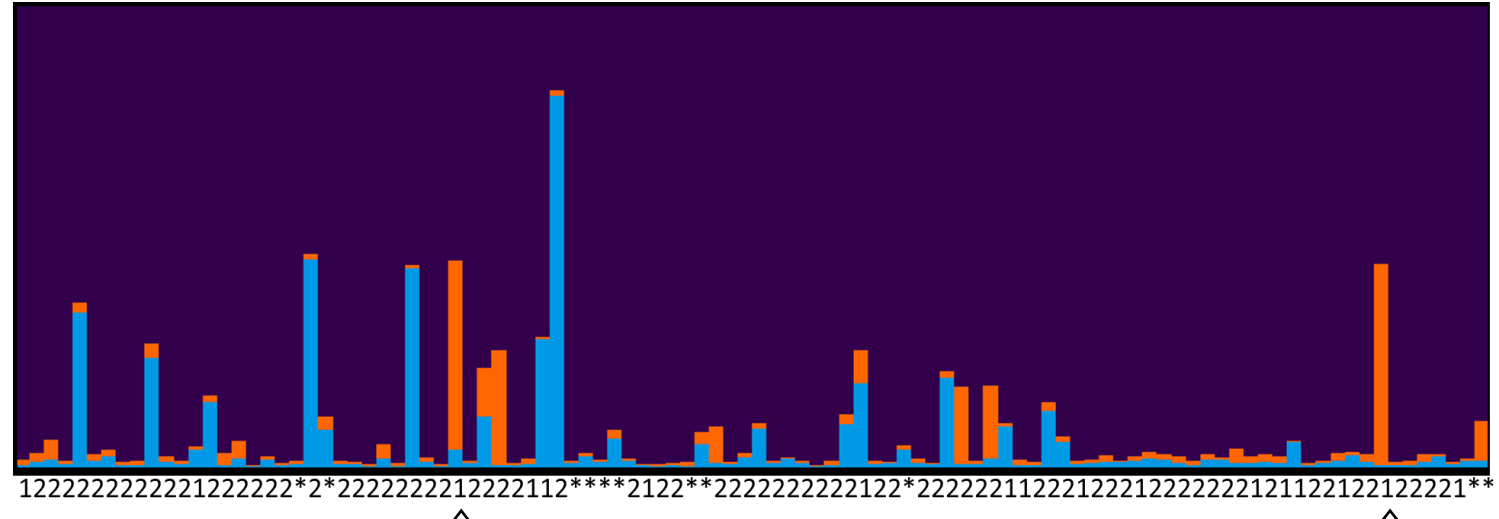

Maui

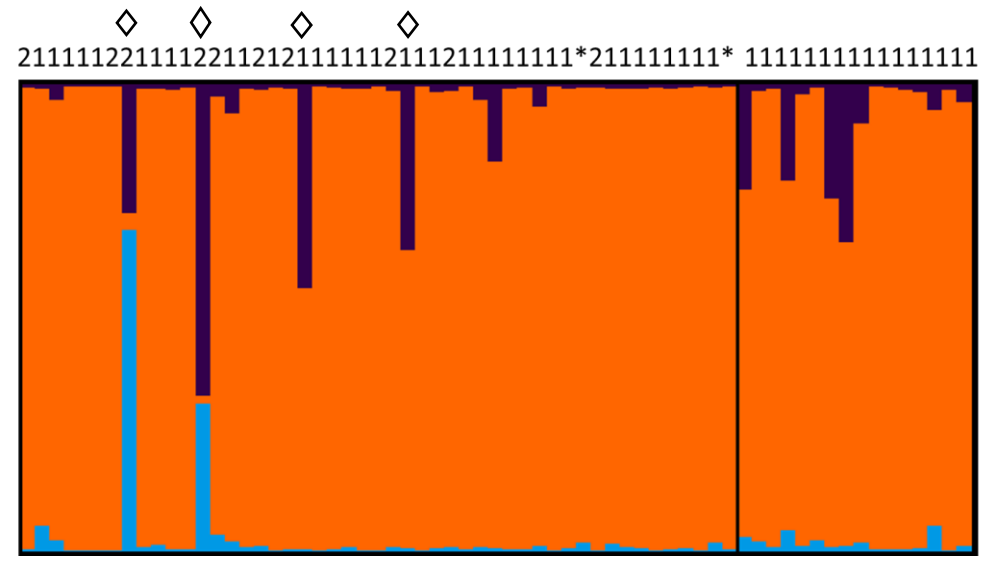

O'ahu

Kaua'i

Legend

- 1 mtDNA COI clusters with Hawaii1 Clade
- 2 mtDNA COI clusters with Hawaii2 Clade
- \* Not sequenced
- ◇ Potential migrant ancestry
